# Supplementary material for: Healthcare fragmentation, multimorbidity, potentially inappropriate medication, and mortality: a Danish nationwide cohort study
Source: Springer Nature journal article supplement (doi:10.1186/s12916-023-03021-3), 2023-08-15
Supplement: MOESM1 [file 25925534]

# Healthcare fragmentation, multimorbidity, potentially inappropriate medication, and mortality: a Danish nationwide cohort study

Supplementary methods, tables, and figures.

## Contents:

**Methods S1.** Danish Multimorbidity Index definitions

**Methods S2.** Visualised example of a patient pathway

**Table S1.** Incidence rate ratios of potentially inappropriate medication by care fragmentation measures

**Table S2.** Mortality hazard ratios by care fragmentation measures

**Table S3.** Incidence rate ratios of separate STOPP/START criteria by care fragmentation measures

**Figure S1.** Distribution of care fragmentation measures by number of conditions

**Figure S2.** Potentially inappropriate medication incidence rate ratios by care fragmentation measures and number of conditions

**Figure S3.** Mortality hazard ratios by care fragmentation measures and number of conditions

**Methods S3.** PIM criteria definitions according to the register-adapted STOPP/START criteria

## Methods S1. Danish Multimorbidity Index definitions

| Category                            | Disease group                       | Coding definition                                                                                                                       | Diagnosis codes (ICD-10)           | Diagnosis time frame | Drug codes (ATC)                      | Prescription time frame |
|-------------------------------------|-------------------------------------|-----------------------------------------------------------------------------------------------------------------------------------------|------------------------------------|----------------------|---------------------------------------|-------------------------|
| <b>Circulatory system</b>           | Hypertension                        | Diagnosis AND/OR prescriptions of antihypertensives, if not ischemic heart disease or heart failure (or kidney disease: only diuretics) | I10-I13, I15                       | Ever                 | C02, C04, C07, C08, C09, C03          | Twice last year         |
|                                     | Dyslipidaemia                       | Diagnosis AND/OR drug prescription for lipid-lowering drugs if not ischemic heart disease.                                              | E78                                | Last two years       | C10                                   | Twice last year         |
|                                     | Ischaemic heart disease             | Diagnosis AND/OR prescription for antianginal drug                                                                                      | I20-I25                            | Ever                 | C01DA                                 | Twice last year         |
|                                     | Atrial fibrillation                 | Diagnosis                                                                                                                               | I48                                | Ever                 |                                       |                         |
|                                     | Heart failure                       | Diagnosis                                                                                                                               | I50                                | Ever                 |                                       |                         |
|                                     | Peripheral artery occlusive disease | Diagnosis                                                                                                                               | I70-I74                            | Ever                 |                                       |                         |
|                                     | Stroke                              | Diagnosis                                                                                                                               | I60-I64, I69                       | Ever                 |                                       |                         |
| <b>Endocrine system</b>             | Diabetes mellitus                   | Diagnosis AND/OR prescription of antidiabetics                                                                                          | E10-E14                            | Ever                 | A10A, A10B                            | Twice last year         |
|                                     | Thyroid disorder                    | Diagnosis AND/OR prescription of thyroid therapy drugs                                                                                  | E00-E05, E061-E069, E07            | Last two years       | H03                                   | Twice last year         |
|                                     | Gout                                | Diagnosis                                                                                                                               | E79, M10                           | Ever                 |                                       |                         |
| <b>Pulmonary system and allergy</b> | Chronic pulmonary disease           | Prescription for obstructive airway disease drugs                                                                                       |                                    |                      | R03                                   | Twice last year         |
|                                     | Allergy                             | Prescription for non-sedative antihistamines AND/OR nasal antiallergics                                                                 |                                    |                      | R06AX, R06AE07, R06AE09, R01AC, R01AD | Twice last year         |
| <b>Gastrointestinal system</b>      | Ulcer/chronic gastritis             | Diagnosis                                                                                                                               | K221, K25-K28, K293-K295           | Ever                 |                                       |                         |
|                                     | Chronic liver disease               | Diagnosis                                                                                                                               | B16-B19, K70-K74, K766, I85        | Ever                 |                                       |                         |
|                                     | Inflammatory bowel disease          | Diagnosis                                                                                                                               | K50-K51                            | Ever                 |                                       |                         |
|                                     | Diverticular disease of intestine   | Diagnosis                                                                                                                               | K57                                | Ever                 |                                       |                         |
| <b>Urogenital system</b>            | Chronic kidney disease              | Diagnosis                                                                                                                               | N03, N11, N18-N19                  | Ever                 |                                       |                         |
|                                     | Prostate disorders                  | Diagnosis AND/OR prescription of prostate hyperplasia therapy drugs                                                                     | N40                                | Ever                 | C02CA, G04C                           | Twice last year         |
| <b>Musculoskeletal system</b>       | Connective tissue disorders         | Diagnosis                                                                                                                               | M05-M06, M08-M09, M30-M36, D86     | Ever                 |                                       |                         |
|                                     | Osteoporosis                        | Diagnosis AND/OR prescription for osteoporosis drugs                                                                                    | M80-M82                            | Ever                 | M05B, G03XC01, H05AA                  | Twice last year         |
|                                     | Painful condition                   | Repeated prescriptions of analgesics                                                                                                    |                                    |                      | N02A, N02BA51, N02BE, M01A, M02A      | Four times last year    |
| <b>Haematological system</b>        | HIV/AIDS                            | Diagnosis                                                                                                                               | B20-B24                            | Ever                 |                                       |                         |
|                                     | Anaemias                            | Diagnosis                                                                                                                               | D50-D53, D55-D59, D60-D61, D63-D64 | Last two years       |                                       |                         |
| <b>Cancers</b>                      | Cancer                              | Diagnosis                                                                                                                               | C00-C43, C45-C97                   | Last five years      |                                       |                         |
| <b>Neurological system</b>          | Vision problem                      | Diagnosis                                                                                                                               | H40, H25, H54                      | Ever                 |                                       |                         |
|                                     | Hearing problem                     | Diagnosis                                                                                                                               | H90-H91, H931                      | Ever                 |                                       |                         |
|                                     | Migraine                            | Diagnosis AND/OR prescription of specific anti-migraine drugs                                                                           | G43                                | Last two years       | N02C                                  | Twice last year         |

|                                 |                                            |                                                              |                    |                |       |                 |
|---------------------------------|--------------------------------------------|--------------------------------------------------------------|--------------------|----------------|-------|-----------------|
|                                 | Epilepsy                                   | Diagnosis AND prescription of anti-epileptics                | G40-G47            | Ever           | N03   | Twice last year |
|                                 | Parkinson's disease                        | Diagnosis                                                    | G20-G22            | Ever           |       |                 |
|                                 | Multiple sclerosis                         | Diagnosis                                                    | G35                | Ever           |       |                 |
|                                 | Neuropathies                               | Diagnosis                                                    | G50-G64            | Last two years |       |                 |
| <b>Mental health conditions</b> | Mood, stress-related, or anxiety disorders | Diagnosis                                                    | F32-F34, F40-F48   | Last two years |       |                 |
|                                 | Psychological distress                     | Prescription of antidepressants if not other mental disorder |                    |                | N06A  | Twice last year |
|                                 | Alcohol problems                           | Diagnosis                                                    | F101-F109          | Last two years |       |                 |
|                                 | Substance abuse                            | Diagnosis                                                    | F11-F16, F18-F19   | Last two years |       |                 |
|                                 | Anorexia/bulimia                           | Diagnosis                                                    | F50                | Last two years |       |                 |
|                                 | Bipolar affective disorder                 | Diagnosis AND/OR prescription of lithium salts               | F30-F31            | Ever           | N05AN | Twice last year |
|                                 | Schizophrenia or schizoaffective disorder  | Diagnosis                                                    | F20, F25           | Ever           |       |                 |
|                                 | Dementia                                   | Diagnosis AND/OR prescription of anti-dementia drugs         | F00-F03, F051, G30 | Ever           | N06D  | Twice last year |

Abbreviations: ICD-10, International Classification of Diseases, version 10; ATC, Anatomical Therapeutic Chemical Classification System; HIV, human immunodeficiency virus; AIDS, acquired immunodeficiency syndrome.

ICD-10 diagnosis code recorded or redeemed prescription of ATC-coded drug registered within defined time frames in national health registers (the Danish National Patient Register, the Danish Psychiatric Central Register, and the Danish National Prescription Registry.)

<sup>a</sup>Prior A, Fenger-Grøn M, Larsen KK, et al. The association between perceived stress and mortality among people with multimorbidity: A prospective population-based cohort study. *Am J Epidemiol.* 2016;184(3):199-210. doi:10.1093/aje/kwv324

**Methods S2.** Visualised example of a patient pathway

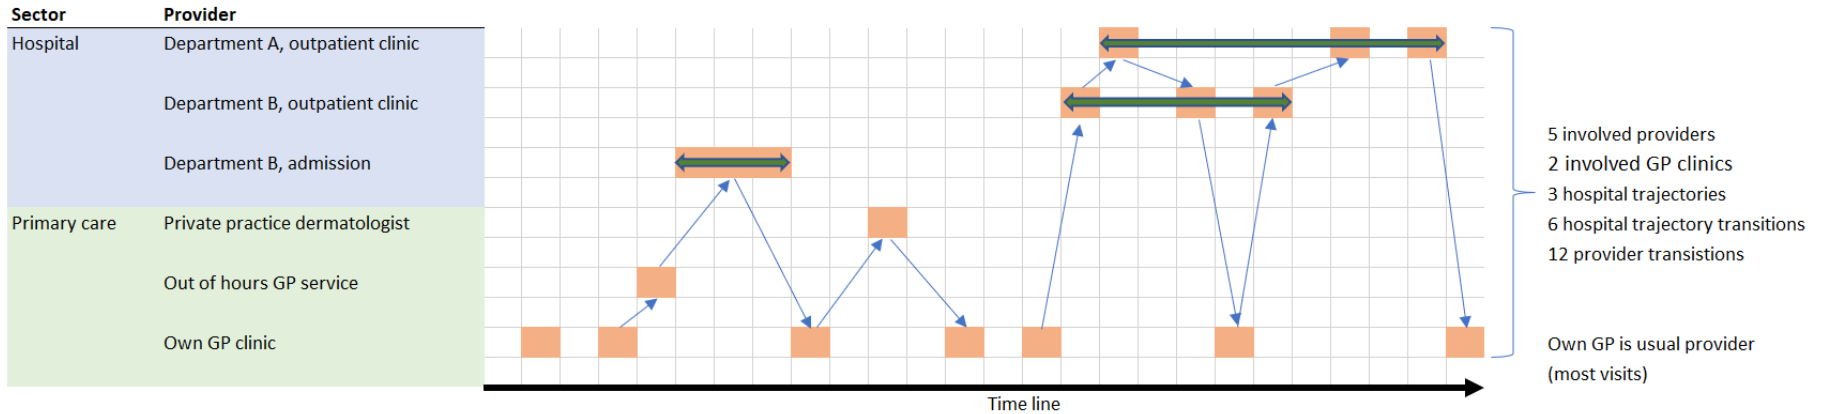

**Legend**

- Contact with provider
- Provider transition
- Hospital trajectory
- Hospital trajectory transitions

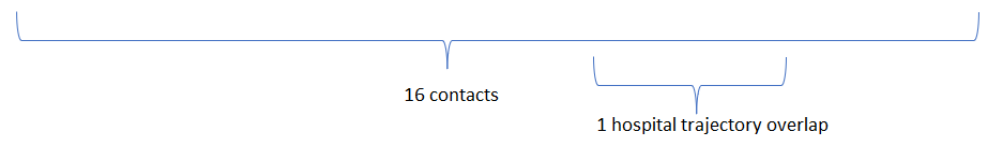

Usual provider index (UPC) =  $\max(7/16; 1/16; 1/16; 4/16; 3/16) = 0.44$   
 Continuity Of Care Index (COCI) =  $((7^2+1^2+1^2+4^2+3^2)-1)/(16*(16-1)) = 0.31$   
 Sequential Continuity Index (SECON) =  $(1+0+0+0+0+1+0+0+0+0+0+0+0+0+0+0)/(16-1) = 0.20$   
 Known GP Index =  $7/16 = 0.44$

**Table S1.** Incidence rate ratios of potentially inappropriate medication by care fragmentation measures

| Measure                                | Persons<br>N (%) | Potentially inappropriate medication (PIM) |                            |      |              |       |             |
|----------------------------------------|------------------|--------------------------------------------|----------------------------|------|--------------|-------|-------------|
|                                        |                  | PIM time<br>(1000 yrs)                     | Time at risk<br>(1000 yrs) | IRR* | 95% CI       | IRR** | 95% CI      |
| <b>Involved providers</b>              |                  |                                            |                            |      |              |       |             |
| 0                                      | 558,761 (12.0)   | 26                                         | 478                        | 1    | Ref.         | 1     | Ref.        |
| 1                                      | 1,168,709 (25.1) | 131                                        | 1,096                      | 1.82 | (1.79,1.86)  | 1.51  | (1.48,1.54) |
| 2                                      | 950,672 (20.4)   | 150                                        | 901                        | 2.30 | (2.26,2.35)  | 1.76  | (1.73,1.80) |
| 3                                      | 669,717 (14.4)   | 136                                        | 636                        | 2.81 | (2.75,2.87)  | 1.99  | (1.95,2.03) |
| 4                                      | 439,971 (9.5)    | 111                                        | 418                        | 3.38 | (3.30,3.46)  | 2.21  | (2.16,2.26) |
| 5+                                     | 864,012 (18.6)   | 350                                        | 813                        | 5.11 | (5.00,5.21)  | 2.55  | (2.50,2.60) |
| <b>Involved GP clinics</b>             |                  |                                            |                            |      |              |       |             |
| 0                                      | 679,538 (14.6)   | 37                                         | 590                        | 1    | Ref.         | 1     | Ref.        |
| 1                                      | 2,760,932 (59.4) | 539                                        | 2,617                      | 2.21 | (2.18,2.25)  | 1.63  | (1.60,1.65) |
| 2                                      | 610,730 (13.1)   | 140                                        | 572                        | 2.82 | (2.76,2.88)  | 1.84  | (1.80,1.88) |
| 3                                      | 302,229 (6.5)    | 80                                         | 284                        | 3.19 | (3.11,3.27)  | 1.94  | (1.89,1.99) |
| 4                                      | 123,865 (2.7)    | 37                                         | 116                        | 3.71 | (3.58,3.85)  | 2.10  | (2.03,2.17) |
| 5+                                     | 174,548 (3.8)    | 70                                         | 161                        | 5.02 | (4.86,5.17)  | 2.28  | (2.21,2.35) |
| <b>Provider transitions</b>            |                  |                                            |                            |      |              |       |             |
| 0                                      | 1,727,470 (37.1) | 157                                        | 1,574                      | 1    | Ref.         | 1     | Ref.        |
| 1                                      | 431,562 (9.3)    | 49                                         | 405                        | 1.25 | (1.22,1.27)  | 1.20  | (1.18,1.22) |
| 2                                      | 548,650 (11.8)   | 92                                         | 521                        | 1.56 | (1.53,1.58)  | 1.35  | (1.33,1.38) |
| 3                                      | 313,008 (6.7)    | 55                                         | 297                        | 1.68 | (1.65,1.72)  | 1.44  | (1.41,1.47) |
| 4                                      | 309,222 (6.6)    | 68                                         | 294                        | 1.91 | (1.87,1.96)  | 1.53  | (1.50,1.57) |
| 5-9                                    | 766,470 (16.5)   | 213                                        | 729                        | 2.33 | (2.30,2.37)  | 1.71  | (1.68,1.73) |
| 10-19                                  | 430,859 (9.3)    | 185                                        | 408                        | 3.29 | (3.23,3.36)  | 1.92  | (1.89,1.96) |
| 20+                                    | 124,601 (2.7)    | 85                                         | 114                        | 5.24 | (5.06,5.42)  | 1.99  | (1.92,2.06) |
| <b>Total contacts</b>                  |                  |                                            |                            |      |              |       |             |
| 0                                      | 558,761 (12.0)   | 26                                         | 478                        | 1    | Ref.         | 1     | Ref.        |
| 1                                      | 332,401 (7.1)    | 21                                         | 307                        | 1.37 | (1.33,1.40)  | 1.29  | (1.26,1.32) |
| 2                                      | 310,107 (6.7)    | 24                                         | 289                        | 1.56 | (1.52,1.60)  | 1.42  | (1.38,1.45) |
| 3                                      | 290,378 (6.2)    | 26                                         | 272                        | 1.73 | (1.69,1.78)  | 1.52  | (1.48,1.56) |
| 4                                      | 272,206 (5.9)    | 28                                         | 256                        | 1.89 | (1.84,1.94)  | 1.61  | (1.57,1.65) |
| 5-9                                    | 1,067,263 (22.9) | 150                                        | 1,012                      | 2.39 | (2.34,2.43)  | 1.87  | (1.83,1.90) |
| 10-19                                  | 1,083,715 (23.3) | 264                                        | 1,034                      | 3.57 | (3.50,3.64)  | 2.34  | (2.30,2.39) |
| 20+                                    | 737,011 (15.8)   | 366                                        | 694                        | 6.38 | (6.24,6.52)  | 2.83  | (2.77,2.90) |
| <b>Hospital trajectory overlaps</b>    |                  |                                            |                            |      |              |       |             |
| 0                                      | 3,438,392 (73.9) | 458                                        | 3,197                      | 1    | Ref.         | 1     | Ref.        |
| 1                                      | 817,669 (17.6)   | 257                                        | 775                        | 1.92 | (1.89,1.94)  | 1.46  | (1.44,1.48) |
| 2                                      | 312,501 (6.7)    | 132                                        | 293                        | 2.47 | (2.42,2.52)  | 1.51  | (1.48,1.54) |
| 3                                      | 64,730 (1.4)     | 40                                         | 60                         | 3.54 | (3.38,3.70)  | 1.62  | (1.55,1.69) |
| 4                                      | 14,116 (0.3)     | 11                                         | 13                         | 4.59 | (4.17,5.06)  | 1.68  | (1.53,1.85) |
| 5+                                     | 4,434 (0.1)      | 5                                          | 4                          | 6.18 | (5.20,7.34)  | 1.71  | (1.45,2.02) |
| <b>Hospital trajectories</b>           |                  |                                            |                            |      |              |       |             |
| 0                                      | 3,438,392 (73.9) | 458                                        | 3,197                      | 1    | Ref.         | 1     | Ref.        |
| 1                                      | 622,157 (13.4)   | 180                                        | 592                        | 1.81 | (1.78,1.84)  | 1.44  | (1.42,1.46) |
| 2                                      | 274,764 (5.9)    | 100                                        | 259                        | 2.17 | (2.13,2.22)  | 1.50  | (1.47,1.53) |
| 3                                      | 141,936 (3.1)    | 60                                         | 133                        | 2.43 | (2.36,2.51)  | 1.52  | (1.48,1.57) |
| 4                                      | 71,571 (1.5)     | 36                                         | 67                         | 2.86 | (2.74,2.99)  | 1.58  | (1.52,1.65) |
| 5-9                                    | 89,117 (1.9)     | 58                                         | 81                         | 3.54 | (3.40,3.68)  | 1.55  | (1.49,1.61) |
| 10-19                                  | 13,014 (0.3)     | 11                                         | 11                         | 5.23 | (4.73,5.78)  | 1.56  | (1.42,1.72) |
| 20+                                    | 891 (0.0)        | 1                                          | 1                          | 7.70 | (5.25,11.31) | 1.67  | (1.16,2.41) |
| <b>Hospital trajectory transitions</b> |                  |                                            |                            |      |              |       |             |

|                                     |                  |     |       |      |             |      |             |
|-------------------------------------|------------------|-----|-------|------|-------------|------|-------------|
| 0                                   | 3,448,408 (74.1) | 461 | 3,206 | 1    | Ref.        | 1    | Ref.        |
| 1                                   | 217,924 (4.7)    | 70  | 209   | 1.97 | (1.92,2.02) | 1.53 | (1.49,1.57) |
| 2                                   | 426,717 (9.2)    | 121 | 404   | 1.76 | (1.73,1.80) | 1.40 | (1.38,1.43) |
| 3                                   | 93,616 (2.0)     | 35  | 89    | 2.31 | (2.22,2.40) | 1.54 | (1.48,1.60) |
| 4                                   | 17,0525 (3.7)    | 62  | 160   | 2.13 | (2.07,2.19) | 1.48 | (1.44,1.52) |
| 5+                                  | 294,652 (6.3)    | 154 | 272   | 2.94 | (2.87,3.00) | 1.52 | (1.49,1.56) |
| Usual Provider of Care Index (UPC)  |                  |     |       |      |             |      |             |
| 1                                   | 494,140 (15.6)   | 82  | 469   | 1    | Ref.        | 1    | Ref.        |
| 0.75-0.99                           | 1,078,017 (34.1) | 304 | 1,028 | 1.46 | (1.43,1.48) | 1.2  | (1.18,1.22) |
| 0.50-0.74                           | 1,150,510 (36.4) | 309 | 1,090 | 1.53 | (1.51,1.56) | 1.25 | (1.23,1.27) |
| 0.25-0.49                           | 412,095 (13.0)   | 107 | 386   | 1.69 | (1.66,1.73) | 1.37 | (1.34,1.40) |
| 0-0.24                              | 25,433 (0.8)     | 6   | 23    | 1.90 | (1.78,2.02) | 1.49 | (1.40,1.58) |
| Continuity Of Care Index (COCI)     |                  |     |       |      |             |      |             |
| 1                                   | 494,140 (15.6)   | 82  | 469   | 1    | Ref.        | 1    | Ref.        |
| 0.75-0.99                           | 342,142 (10.8)   | 112 | 327   | 1.58 | (1.55,1.62) | 1.25 | (1.23,1.28) |
| 0.50-0.74                           | 899,095 (28.5)   | 247 | 856   | 1.46 | (1.43,1.48) | 1.20 | (1.18,1.22) |
| 0.25-0.49                           | 1,010,407 (32.0) | 271 | 956   | 1.55 | (1.53,1.58) | 1.26 | (1.24,1.28) |
| 0-0.24                              | 414,411 (13.1)   | 95  | 388   | 1.59 | (1.56,1.62) | 1.34 | (1.31,1.37) |
| Sequential Continuity Index (SECON) |                  |     |       |      |             |      |             |
| 1                                   | 494,140 (15.6)   | 82  | 469   | 1    | Ref.        | 1    | Ref.        |
| 0.75-0.99                           | 560,632 (17.7)   | 160 | 532   | 1.47 | (1.44,1.50) | 1.21 | (1.18,1.23) |
| 0.50-0.74                           | 1,136,502 (36.0) | 311 | 1078  | 1.51 | (1.48,1.53) | 1.23 | (1.21,1.25) |
| 0.25-0.49                           | 737,204 (23.3)   | 205 | 698   | 1.63 | (1.60,1.66) | 1.31 | (1.28,1.33) |
| 0-0.24                              | 231,717 (7.3)    | 49  | 218   | 1.49 | (1.45,1.52) | 1.30 | (1.27,1.34) |
| Known GP Index                      |                  |     |       |      |             |      |             |
| 1                                   | 508,030 (16.1)   | 84  | 482   | 1    | Ref.        | 1    | Ref.        |
| 0.75-0.99                           | 1,092,291 (34.6) | 313 | 1,040 | 1.48 | (1.45,1.50) | 1.21 | (1.19,1.23) |
| 0.50-0.74                           | 1,027,733 (32.5) | 290 | 976   | 1.59 | (1.57,1.62) | 1.28 | (1.26,1.30) |
| 0.25-0.49                           | 397,423 (12.6)   | 94  | 373   | 1.57 | (1.54,1.60) | 1.31 | (1.29,1.34) |
| 0-0.24                              | 134,718 (4.3)    | 25  | 124   | 1.38 | (1.34,1.43) | 1.24 | (1.21,1.28) |

\*Adjusted for age and sex, \*\*Further adjusted for civil status, origin, educational attainment, income level, population density, and the 39 individual physical and mental conditions in the Danish Multimorbidity Index  
IRR: Incidence rate ratio, Ref.: reference group, Yrs: years.

**Table S2.** Mortality hazard ratios by care fragmentation measures

| Measure                         | Deaths | CIP     | Mortality |             |      |             |
|---------------------------------|--------|---------|-----------|-------------|------|-------------|
|                                 |        |         | HR*       | 95% CI      | HR** | 95% CI      |
| Involved providers              |        |         |           |             |      |             |
| 0                               | 1,354  | 0.00242 | 1         | Ref.        | 1    | Ref.        |
| 1                               | 6,370  | 0.00545 | 1.23      | (1.16,1.31) | 1.06 | (1.00,1.12) |
| 2                               | 6,522  | 0.00686 | 1.20      | (1.13,1.27) | 0.98 | (0.92,1.04) |
| 3                               | 6,048  | 0.00903 | 1.37      | (1.29,1.45) | 1.05 | (0.99,1.12) |
| 4                               | 5,323  | 0.01210 | 1.65      | (1.55,1.75) | 1.17 | (1.10,1.24) |
| 5+                              | 28,696 | 0.03321 | 3.53      | (3.34,3.73) | 1.89 | (1.79,2.01) |
| Involved GP clinics             |        |         |           |             |      |             |
| 0                               | 1,926  | 0.00283 | 1         | Ref.        | 1    | Ref.        |
| 1                               | 25,393 | 0.00920 | 1.37      | (1.31,1.44) | 1.06 | (1.01,1.11) |
| 2                               | 8,974  | 0.01469 | 2.27      | (2.16,2.38) | 1.41 | (1.34,1.48) |
| 3                               | 6,067  | 0.02007 | 2.83      | (2.68,2.98) | 1.59 | (1.51,1.68) |
| 4                               | 3,353  | 0.02707 | 3.62      | (3.42,3.83) | 1.82 | (1.72,1.93) |
| 5+                              | 8,600  | 0.04927 | 5.53      | (5.26,5.82) | 2.26 | (2.14,2.38) |
| Provider transitions            |        |         |           |             |      |             |
| 0                               | 7,724  | 0.00447 | 1         | Ref.        | 1    | Ref.        |
| 1                               | 1,778  | 0.00412 | 0.85      | (0.81,0.90) | 0.86 | (0.82,0.91) |
| 2                               | 4,073  | 0.00742 | 1.08      | (1.04,1.12) | 0.98 | (0.95,1.02) |
| 3                               | 2,499  | 0.00798 | 1.17      | (1.12,1.23) | 1.07 | (1.02,1.12) |
| 4                               | 3,194  | 0.01033 | 1.25      | (1.20,1.31) | 1.09 | (1.04,1.13) |
| 5-9                             | 11,506 | 0.01501 | 1.57      | (1.53,1.62) | 1.26 | (1.22,1.29) |
| 10-19                           | 13,163 | 0.03055 | 2.50      | (2.43,2.57) | 1.66 | (1.61,1.72) |
| 20+                             | 10,376 | 0.08327 | 5.90      | (5.73,6.08) | 2.80 | (2.71,2.90) |
| Total contacts                  |        |         |           |             |      |             |
| 0                               | 1,354  | 0.00242 | 1         | Ref.        | 1    | Ref.        |
| 1                               | 702    | 0.00211 | 0.82      | (0.75,0.90) | 0.83 | (0.76,0.91) |
| 2                               | 732    | 0.00236 | 0.82      | (0.75,0.90) | 0.83 | (0.76,0.91) |
| 3                               | 763    | 0.00263 | 0.82      | (0.75,0.90) | 0.82 | (0.75,0.90) |
| 4                               | 855    | 0.00314 | 0.87      | (0.80,0.94) | 0.86 | (0.79,0.93) |
| 5-9                             | 5,134  | 0.00481 | 1.04      | (0.98,1.10) | 0.97 | (0.91,1.03) |
| 10-19                           | 11,932 | 0.01101 | 1.60      | (1.51,1.70) | 1.27 | (1.20,1.35) |
| 20+                             | 32,841 | 0.04456 | 4.19      | (3.96,4.43) | 2.26 | (2.13,2.39) |
| Hospital trajectory overlaps    |        |         |           |             |      |             |
| 0                               | 20,026 | 0.00582 | 1         | Ref.        | 1    | Ref.)       |
| 1                               | 15,489 | 0.01894 | 1.87      | (1.83,1.91) | 1.45 | (1.42,1.48) |
| 2                               | 11,970 | 0.03830 | 3.37      | (3.30,3.45) | 2.13 | (2.08,2.18) |
| 3                               | 4,714  | 0.07283 | 5.76      | (5.58,5.95) | 2.92 | (2.82,3.02) |
| 4                               | 1,461  | 0.10350 | 7.96      | (7.54,8.39) | 3.49 | (3.30,3.69) |
| 5+                              | 653    | 0.14727 | 11.7      | (10.8,12.6) | 4.07 | (3.76,4.42) |
| Hospital trajectories           |        |         |           |             |      |             |
| 0                               | 20,026 | 0.00582 | 1         | Ref.        | 1    | Ref.        |
| 1                               | 9,202  | 0.01479 | 1.55      | (1.51,1.59) | 1.29 | (1.25,1.32) |
| 2                               | 6,357  | 0.02314 | 2.17      | (2.11,2.24) | 1.61 | (1.56,1.66) |
| 3                               | 4,612  | 0.03249 | 2.84      | (2.75,2.93) | 1.93 | (1.87,1.99) |
| 4                               | 3,338  | 0.04664 | 3.71      | (3.57,3.85) | 2.32 | (2.23,2.41) |
| 5-9                             | 7,883  | 0.08846 | 6.32      | (6.15,6.49) | 3.38 | (3.28,3.48) |
| 10-19                           | 2,665  | 0.20478 | 16.3      | (15.6,16.9) | 6.25 | (5.98,6.54) |
| 20+                             | 230    | 0.25814 | 42.5      | (37.3,48.4) | 10.8 | (9.48,12.4) |
| Hospital trajectory transitions |        |         |           |             |      |             |
| 0                               | 20,206 | 0.00586 | 1         | Ref.        | 1    | Ref.        |
| 1                               | 3,231  | 0.01483 | 1.50      | (1.44,1.56) | 1.17 | (1.13,1.22) |

|                                     |        |         |      |             |      |             |
|-------------------------------------|--------|---------|------|-------------|------|-------------|
| 2                                   | 6,473  | 0.01517 | 1.59 | (1.54,1.63) | 1.31 | (1.28,1.35) |
| 3                                   | 1,913  | 0.02043 | 2.10 | (2.01,2.20) | 1.46 | (1.39,1.53) |
| 4                                   | 4,363  | 0.02559 | 2.25 | (2.18,2.32) | 1.64 | (1.59,1.70) |
| 5+                                  | 18,127 | 0.06152 | 4.82 | (4.72,4.92) | 2.73 | (2.67,2.79) |
| Usual Provider of Care Index (UPC)  |        |         |      |             |      |             |
| 1                                   | 4,763  | 0.00964 | 1    | Ref.        | 1    | Ref.        |
| 0.75-0.99                           | 19,003 | 0.01763 | 1.34 | (1.29,1.38) | 1.05 | (1.02,1.09) |
| 0.50-0.74                           | 18,533 | 0.01611 | 1.46 | (1.41,1.51) | 1.19 | (1.15,1.23) |
| 0.25-0.49                           | 7,960  | 0.01932 | 2.12 | (2.05,2.20) | 1.70 | (1.64,1.76) |
| 0-0.24                              | 503    | 0.01978 | 3.79 | (3.45,4.15) | 2.59 | (2.36,2.84) |
| Continuity Of Care Index (COCI)     |        |         |      |             |      |             |
| 1                                   | 4,763  | 0.00964 | 1    | Ref.        | 1    | Ref.        |
| 0.75-0.99                           | 7,849  | 0.02294 | 1.45 | (1.40,1.51) | 1.09 | (1.05,1.13) |
| 0.50-0.74                           | 14,655 | 0.01630 | 1.31 | (1.27,1.36) | 1.05 | (1.01,1.08) |
| 0.25-0.49                           | 16,861 | 0.01669 | 1.53 | (1.48,1.58) | 1.25 | (1.21,1.29) |
| 0-0.24                              | 6,634  | 0.01601 | 2.07 | (1.99,2.15) | 1.70 | (1.63,1.76) |
| Sequential Continuity Index (SECON) |        |         |      |             |      |             |
| 1                                   | 4,763  | 0.00964 | 1    | Ref.        | 1    | Ref.        |
| 0.75-0.99                           | 11,578 | 0.02065 | 1.50 | (1.45,1.56) | 1.14 | (1.10,1.18) |
| 0.50-0.74                           | 19,428 | 0.01709 | 1.44 | (1.39,1.48) | 1.14 | (1.10,1.18) |
| 0.25-0.49                           | 12,399 | 0.01682 | 1.58 | (1.53,1.64) | 1.30 | (1.25,1.34) |
| 0-0.24                              | 2,594  | 0.01119 | 1.49 | (1.42,1.57) | 1.39 | (1.33,1.46) |
| Known GP Index                      |        |         |      |             |      |             |
| 1                                   | 4,907  | 0.00966 | 1    | Ref.        | 1    | Ref.        |
| 0.75-0.99                           | 19,916 | 0.01823 | 1.35 | (1.31,1.39) | 1.05 | (1.02,1.08) |
| 0.50-0.74                           | 16,867 | 0.01641 | 1.43 | (1.39,1.48) | 1.15 | (1.12,1.19) |
| 0.25-0.49                           | 6,575  | 0.01654 | 1.92 | (1.85,1.99) | 1.65 | (1.59,1.72) |
| 0-0.24                              | 2,497  | 0.01854 | 2.71 | (2.58,2.84) | 2.48 | (2.36,2.60) |

\*Adjusted for age and sex, \*\*Further adjusted for civil status, origin, educational attainment, income level, population density, and the 39 individual physical and mental conditions in the Danish Multimorbidity Index

CIP: Cumulative incidence proportion, HR: Hazard ratio, Ref.: reference group.



**Table S3.** Incidence rate ratios of separate STOPP/START criteria by care fragmentation measures

| Measure                             | START                |                          |      |             | STOPP                |                          |      |              |
|-------------------------------------|----------------------|--------------------------|------|-------------|----------------------|--------------------------|------|--------------|
|                                     | PIM time (1,000 yrs) | Time at risk (1,000 yrs) | IRR* | 95% CI      | PIM time (1,000 yrs) | Time at risk (1,000 yrs) | IRR* | 95% CI       |
| <b>Involved providers</b>           |                      |                          |      |             |                      |                          |      |              |
| 0                                   | 24                   | 22                       | 1    | Ref.        | 1                    | 478                      | 1    | Ref.         |
| 1                                   | 115                  | 116                      | 1.24 | (1.22,1.25) | 16                   | 1,096                    | 3.14 | (3.04,3.24)  |
| 2                                   | 130                  | 131                      | 1.35 | (1.33,1.36) | 21                   | 900                      | 4.18 | (4.04,4.32)  |
| 3                                   | 116                  | 115                      | 1.45 | (1.43,1.46) | 19                   | 636                      | 4.86 | (4.69,5.04)  |
| 4                                   | 94                   | 92                       | 1.54 | (1.52,1.56) | 17                   | 418                      | 5.58 | (5.36,5.81)  |
| 5+                                  | 293                  | 267                      | 1.70 | (1.69,1.72) | 57                   | 813                      | 7.21 | (6.95,7.47)  |
| <b>Involved GP clinics</b>          |                      |                          |      |             |                      |                          |      |              |
| 0                                   | 35                   | 31                       | 1    | Ref.        | 2                    | 590                      | 1    | Ref.         |
| 1                                   | 465                  | 457                      | 1.29 | (1.28,1.30) | 74                   | 2,617                    | 3.16 | (3.08,3.25)  |
| 2                                   | 118                  | 113                      | 1.39 | (1.37,1.40) | 22                   | 572                      | 3.95 | (3.81,4.09)  |
| 3                                   | 67                   | 64                       | 1.43 | (1.42,1.45) | 13                   | 284                      | 4.23 | (4.05,4.41)  |
| 4                                   | 31                   | 28                       | 1.50 | (1.48,1.53) | 6                    | 116                      | 5.03 | (4.74,5.34)  |
| 5+                                  | 57                   | 49                       | 1.61 | (1.58,1.63) | 13                   | 161                      | 5.98 | (5.67,6.31)  |
| <b>Provider transitions</b>         |                      |                          |      |             |                      |                          |      |              |
| 0                                   | 139                  | 138                      | 1    | Ref.        | 17                   | 1,573                    | 1    | Ref.         |
| 1                                   | 44                   | 43                       | 1.12 | (1.11,1.13) | 5                    | 405                      | 1.28 | (1.24,1.33)  |
| 2                                   | 79                   | 80                       | 1.18 | (1.17,1.19) | 13                   | 521                      | 1.77 | (1.72,1.82)  |
| 3                                   | 48                   | 47                       | 1.24 | (1.22,1.25) | 7                    | 297                      | 1.76 | (1.70,1.83)  |
| 4                                   | 58                   | 58                       | 1.26 | (1.25,1.27) | 10                   | 294                      | 2.10 | (2.02,2.18)  |
| 5-9                                 | 181                  | 177                      | 1.35 | (1.34,1.36) | 32                   | 729                      | 2.48 | (2.42,2.55)  |
| 10-19                               | 154                  | 143                      | 1.46 | (1.45,1.47) | 31                   | 408                      | 3.01 | (2.91,3.12)  |
| 20+                                 | 68                   | 56                       | 1.54 | (1.52,1.56) | 16                   | 114                      | 3.52 | (3.32,3.72)  |
| <b>Total contacts</b>               |                      |                          |      |             |                      |                          |      |              |
| 0                                   | 24                   | 22                       | 1    | Ref.        | 1                    | 478                      | 1    | Ref.         |
| 1                                   | 20                   | 19                       | 1.16 | (1.15,1.18) | 1                    | 307                      | 1.69 | (1.62,1.77)  |
| 2                                   | 22                   | 21                       | 1.22 | (1.20,1.24) | 2                    | 289                      | 2.16 | (2.07,2.26)  |
| 3                                   | 24                   | 23                       | 1.27 | (1.25,1.28) | 2                    | 272                      | 2.77 | (2.65,2.90)  |
| 4                                   | 25                   | 25                       | 1.30 | (1.28,1.32) | 2                    | 256                      | 2.97 | (2.84,3.11)  |
| 5-9                                 | 135                  | 135                      | 1.40 | (1.39,1.42) | 15                   | 1,012                    | 4.10 | (3.96,4.23)  |
| 10-19                               | 227                  | 229                      | 1.56 | (1.55,1.58) | 36                   | 1,034                    | 6.62 | (6.40,6.85)  |
| 20+                                 | 295                  | 270                      | 1.73 | (1.71,1.75) | 71                   | 693                      | 9.98 | (9.61,10.36) |
| <b>Hospital trajectory overlaps</b> |                      |                          |      |             |                      |                          |      |              |
| 0                                   | 398                  | 392                      | 1    | Ref.        | 60                   | 3,197                    | 1    | Ref.         |
| 1                                   | 218                  | 210                      | 1.24 | (1.23,1.25) | 39                   | 775                      | 1.82 | (1.77,1.86)  |
| 2                                   | 110                  | 102                      | 1.28 | (1.26,1.29) | 22                   | 292                      | 2.03 | (1.96,2.11)  |
| 3                                   | 33                   | 29                       | 1.35 | (1.32,1.37) | 7                    | 60                       | 2.35 | (2.18,2.54)  |
| 4                                   | 9                    | 7                        | 1.39 | (1.34,1.45) | 2                    | 13                       | 2.61 | (2.22,3.06)  |
| 5+                                  | 4                    | 3                        | 1.50 | (1.40,1.60) | 1                    | 4                        | 2.38 | (1.79,3.17)  |
| <b>Hospital trajectories</b>        |                      |                          |      |             |                      |                          |      |              |
| 0                                   | 398                  | 392                      | 1    | Ref.        | 60                   | 3,197                    | 1    | Ref.         |
| 1                                   | 153                  | 149                      | 1.23 | (1.22,1.24) | 27                   | 592                      | 1.80 | (1.76,1.85)  |
| 2                                   | 84                   | 80                       | 1.26 | (1.25,1.27) | 16                   | 259                      | 1.91 | (1.84,1.99)  |
| 3                                   | 50                   | 47                       | 1.28 | (1.27,1.30) | 10                   | 133                      | 2.04 | (1.94,2.15)  |
| 4                                   | 30                   | 27                       | 1.32 | (1.30,1.34) | 6                    | 67                       | 2.06 | (1.92,2.21)  |
| 5-9                                 | 48                   | 41                       | 1.33 | (1.31,1.36) | 10                   | 81                       | 2.24 | (2.10,2.39)  |
| 10-19                               | 9                    | 7                        | 1.42 | (1.36,1.48) | 2                    | 11                       | 2.66 | (2.25,3.14)  |
| 20+                                 | 1                    | 0.4                      | 1.48 | (1.27,1.72) | 0.2                  | 1                        | 2.63 | (1.40,4.95)  |

|                                     |     |     |      |             |    |       |      |             |  |
|-------------------------------------|-----|-----|------|-------------|----|-------|------|-------------|--|
| Hospital trajectory transitions     |     |     |      |             |    |       |      |             |  |
| 0                                   | 400 | 394 | 1    | Ref.        | 61 | 3,206 | 1    | Ref.        |  |
| 1                                   | 59  | 58  | 1.26 | (1.24,1.27) | 11 | 209   | 2.10 | (2.01,2.19) |  |
| 2                                   | 103 | 99  | 1.22 | (1.21,1.23) | 18 | 404   | 1.67 | (1.62,1.72) |  |
| 3                                   | 29  | 28  | 1.28 | (1.26,1.30) | 6  | 89    | 2.08 | (1.95,2.22) |  |
| 4                                   | 53  | 50  | 1.26 | (1.24,1.27) | 10 | 160   | 1.78 | (1.70,1.87) |  |
| 5+                                  | 128 | 114 | 1.3  | (1.29,1.32) | 26 | 272   | 2.06 | (1.98,2.14) |  |
| Usual Provider of Care Index (UPC)  |     |     |      |             |    |       |      |             |  |
| 1                                   | 69  | 72  | 1    | Ref.        | 13 | 469   | 1    | Ref.        |  |
| 0.75-0.99                           | 250 | 246 | 1.11 | (1.10,1.12) | 54 | 1,027 | 1.3  | (1.27,1.34) |  |
| 0.50-0.74                           | 265 | 250 | 1.18 | (1.17,1.19) | 44 | 1,090 | 1.18 | (1.15,1.22) |  |
| 0.25-0.49                           | 94  | 85  | 1.27 | (1.25,1.28) | 13 | 386   | 1.2  | (1.16,1.25) |  |
| 0-0.24                              | 5   | 4   | 1.36 | (1.32,1.41) | 1  | 23    | 1.17 | (1.05,1.31) |  |
| Continuity Of Care Index (COCI)     |     |     |      |             |    |       |      |             |  |
| 1                                   | 69  | 72  | 1    | Ref.        | 13 | 469   | 1    | Ref.        |  |
| 0.75-0.99                           | 89  | 89  | 1.11 | (1.10,1.12) | 23 | 327   | 1.57 | (1.51,1.63) |  |
| 0.50-0.74                           | 206 | 201 | 1.13 | (1.12,1.14) | 41 | 856   | 1.22 | (1.18,1.26) |  |
| 0.25-0.49                           | 233 | 220 | 1.19 | (1.18,1.20) | 38 | 956   | 1.19 | (1.15,1.22) |  |
| 0-0.24                              | 85  | 77  | 1.26 | (1.25,1.27) | 11 | 387   | 1.1  | (1.06,1.14) |  |
| Sequential Continuity Index (SECON) |     |     |      |             |    |       |      |             |  |
| 1                                   | 69  | 72  | 1    | Ref.        | 13 | 469   | 1    | Ref.        |  |
| 0.75-0.99                           | 130 | 129 | 1.11 | (1.10,1.12) | 30 | 532   | 1.38 | (1.34,1.43) |  |
| 0.50-0.74                           | 262 | 253 | 1.15 | (1.14,1.16) | 49 | 1,078 | 1.22 | (1.19,1.26) |  |
| 0.25-0.49                           | 178 | 165 | 1.22 | (1.21,1.23) | 27 | 698   | 1.21 | (1.17,1.25) |  |
| 0-0.24                              | 43  | 40  | 1.24 | (1.22,1.25) | 5  | 218   | 1.03 | (0.99,1.08) |  |
| Known GP Index                      |     |     |      |             |    |       |      |             |  |
| 1                                   | 71  | 75  | 1    | Ref.        | 13 | 482   | 1    | Ref.        |  |
| 0.75-0.99                           | 257 | 253 | 1.12 | (1.11,1.13) | 56 | 1,040 | 1.32 | (1.28,1.36) |  |
| 0.50-0.74                           | 249 | 235 | 1.20 | (1.19,1.21) | 41 | 976   | 1.21 | (1.17,1.24) |  |
| 0.25-0.49                           | 83  | 76  | 1.23 | (1.22,1.25) | 11 | 373   | 1.13 | (1.09,1.17) |  |
| 0-0.24                              | 23  | 20  | 1.20 | (1.18,1.22) | 3  | 124   | 1.12 | (1.06,1.17) |  |

\*Adjusted for age, sex, civil status, origin, educational attainment, income level, population density, and the 39 individual physical and mental conditions in the Danish Multimorbidity Index

IRR: Incidence rate ratio

Definitions in:

*Potentially inappropriate medications (PIMs): frequency and extent of GP-related variation in PIMs: a register-based cohort study.* Ribe et al., BMJ Open, 2021

*STOPP/START criteria for potentially inappropriate prescribing in older people: Version 2.* O'Mahony et al. 2015

**Figure S1.** Distribution of care fragmentation measures by number of conditions

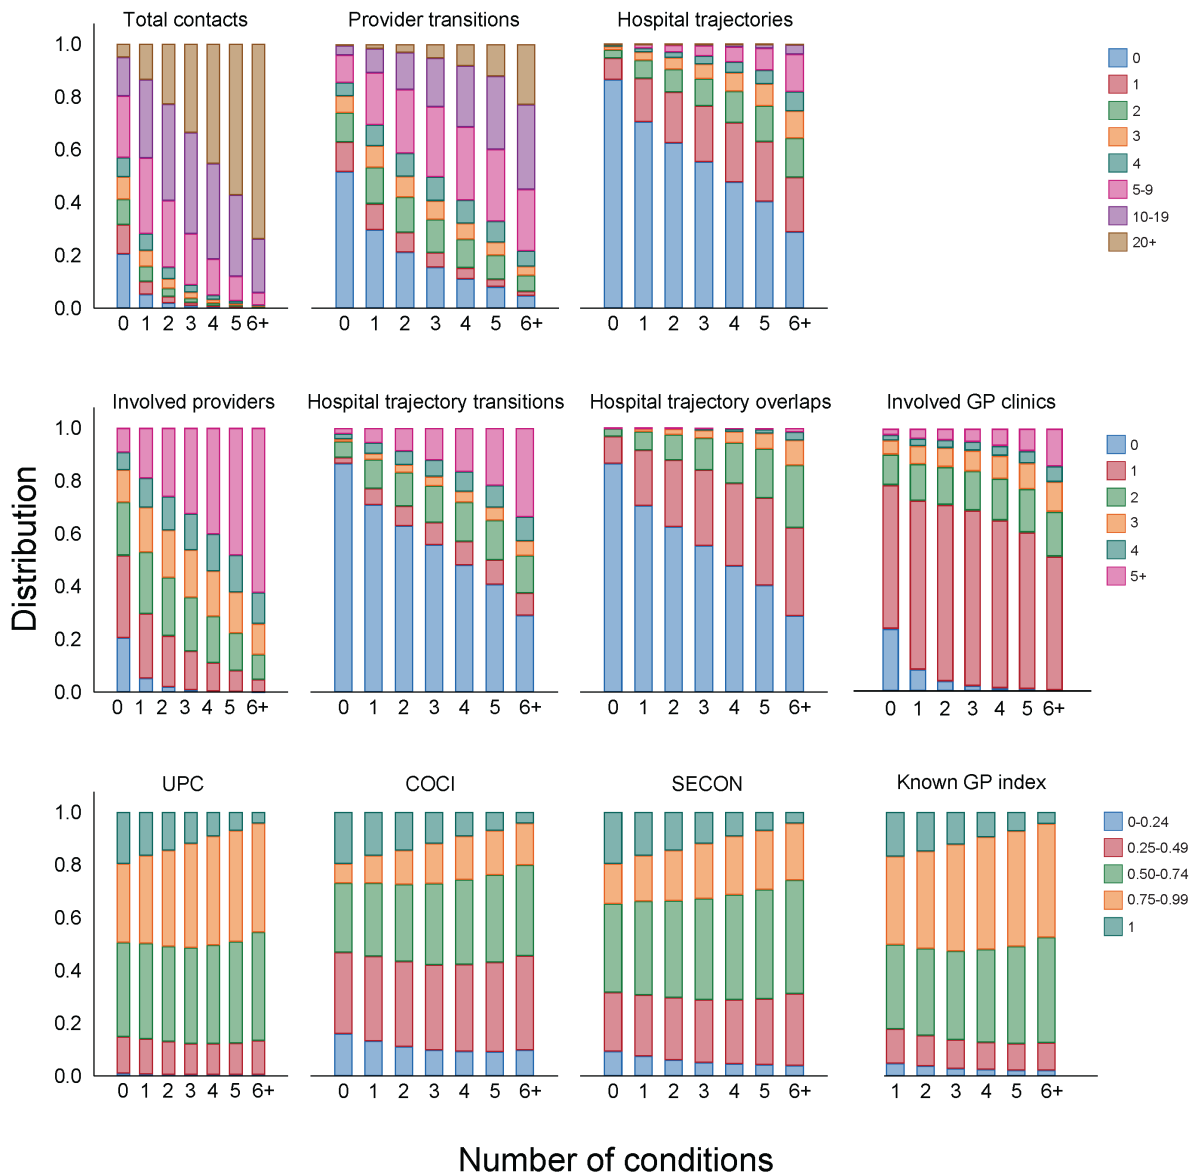

The values of the colours are stated to the right.

UPC: Usual Provider of Care Index, SECON: Sequential Continuity Index, COCI: Continuity of Care Index, GP: General practitioner

**Figure S2.** Potentially inappropriate medication incidence rate ratios by care fragmentation measures and number of conditions

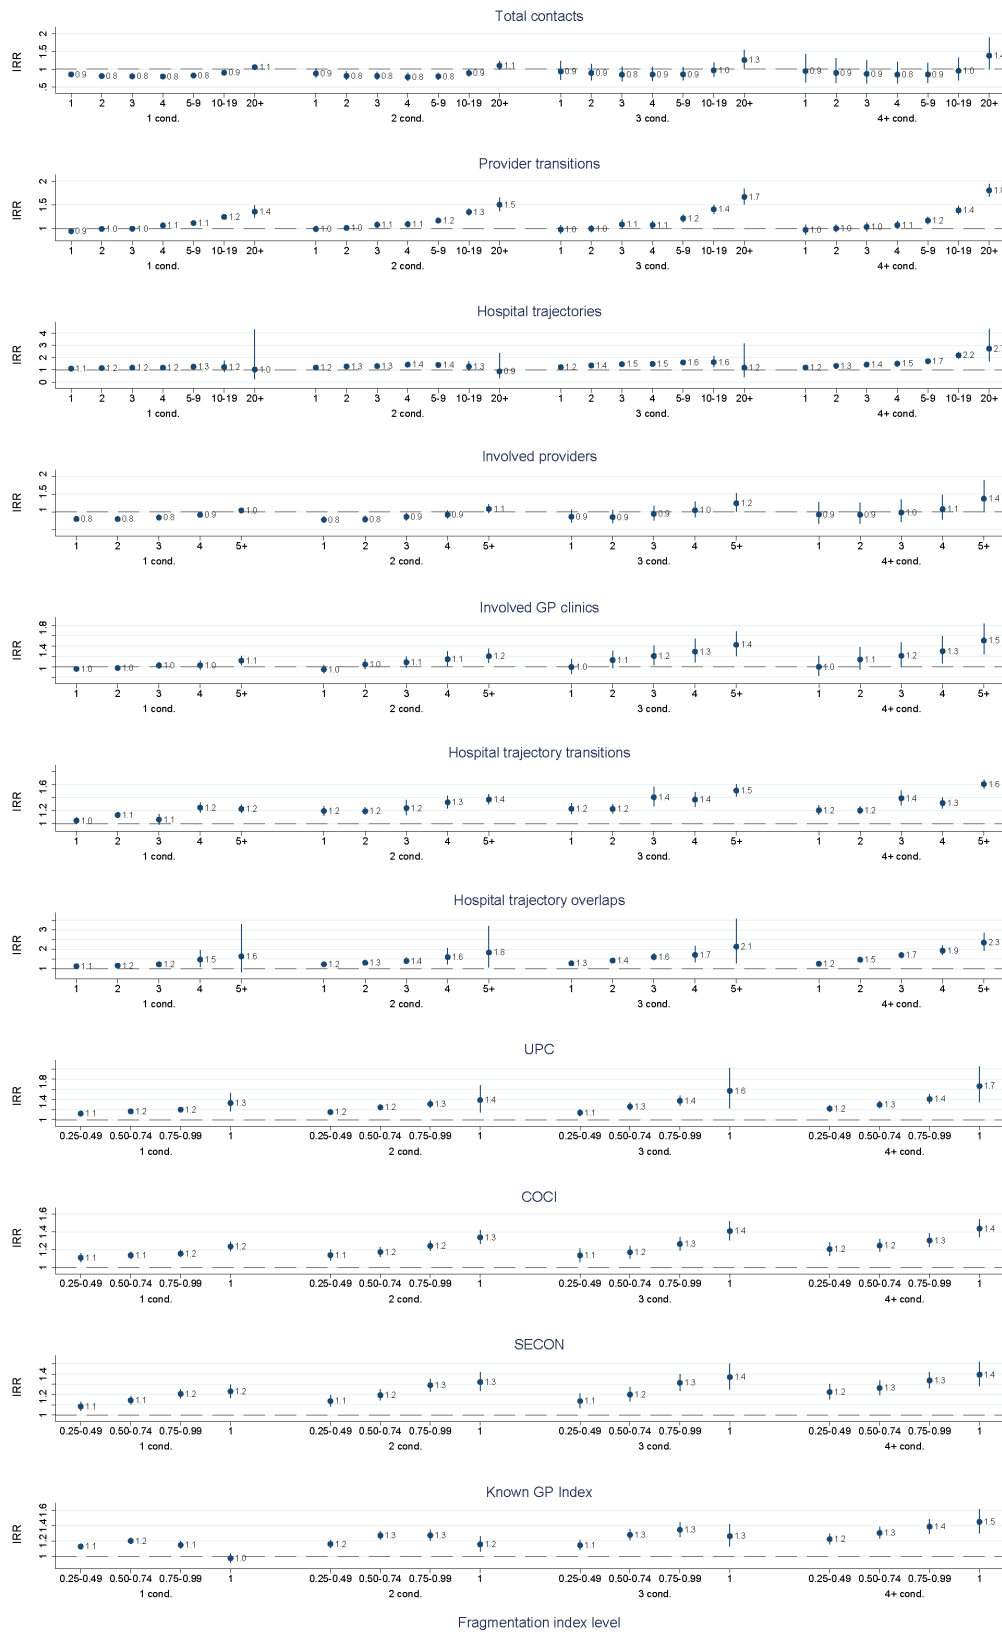

UPC: Usual Provider of Care Index, SECON: Sequential Continuity Index, COCI: Continuity of Care Index, GP: General practitioner, Cond.: Conditions

**Figure S3. Mortality hazard ratios by care fragmentation measures and number of conditions**

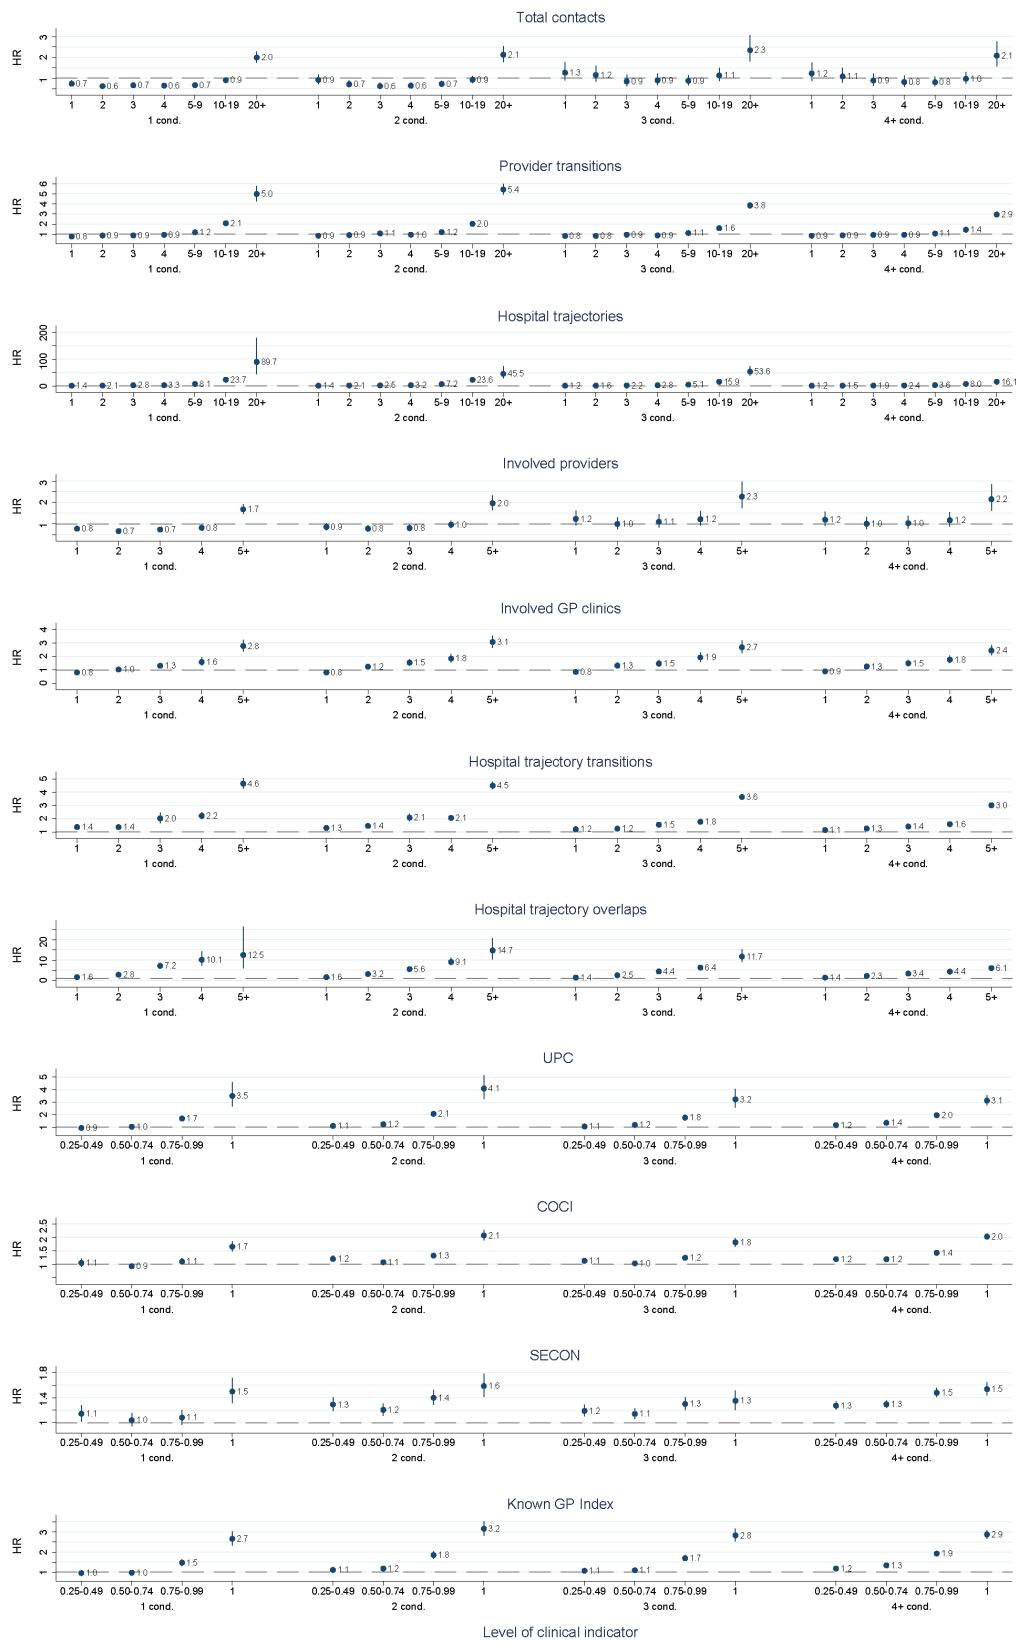

UPC: Usual Provider of Care Index, SECON: Sequential Continuity Index, COCI: Continuity of Care Index, GP: General practitioner, Cond.: Conditions

Methods S3. PIM criteria definitions according to the register-adapted STOPP/START criteria

| ID       | Description                                                                                                                       | A<br>ICD-10<br><i>Atrial fibrillation</i> | B<br>ATC<br><i>Vitamin K antagonists,<br/>direct thrombin inhibitors<br/>or factor Xa inhibitors</i> | Risk              | Code                   |
|----------|-----------------------------------------------------------------------------------------------------------------------------------|-------------------------------------------|------------------------------------------------------------------------------------------------------|-------------------|------------------------|
| START A1 | Start vitamin K antagonists or direct thrombin inhibitors or factor Xa inhibitors in the presence of chronic atrial fibrillation. | I48*                                      | B01AA*, B01AE*,<br>B01AF*                                                                            | A if CHADVASC >=2 | A & IB if CHADVASC >=2 |

| ID       | Description                                                                                                                                                                 | A<br>ATC<br><i>Vit K antagonists, direct<br/>thrombin inhibitors or<br/>factor Xa inhibitors</i> | B<br>ICD-10<br><i>Coronary, cerebral or<br/>peripheral vascular<br/>disease</i>                                        | C<br>Procedure codes<br><i>Coronary implants<br/>(CABG or PCI)</i> | D<br>ATC<br><i>Antiplatelet agents</i> | Risk         | Code                 |
|----------|-----------------------------------------------------------------------------------------------------------------------------------------------------------------------------|--------------------------------------------------------------------------------------------------|------------------------------------------------------------------------------------------------------------------------|--------------------------------------------------------------------|----------------------------------------|--------------|----------------------|
| START A3 | Start antiplatelet therapy (acetylsalicylic acid or clopidogrel or prasugrel or ticagrelor) with a documented history of coronary, cerebral or peripheral vascular disease. | B01AA*, B01AE*,<br>B01AF*                                                                        | I20*, I21*, I22*, I23*,<br>I24*, I25*, E10.5, E11.5,<br>E14.5, I70.2, I73.9,<br>I74.3, I63*, I64*, I65*,<br>I66*, G45* | KFN*, KZFX01                                                       | B01AC*                                 | !A & (B   C) | [(A & (B   C))] & !D |

| ID       | Description                                                                                                                                                           | A<br>ICD-10<br><i>Coronary, cerebral or<br/>peripheral vascular<br/>disease</i>                                        | B<br>Procedure codes<br><i>Coronary implants<br/>(CABG or PCI)</i> | C<br>ICD-10<br><i>Chronic kidney disease</i> | D<br>ICD-10<br><i>Rhabdomyolysis</i> | E<br>ATC<br><i>Statins</i> | Risk                                  | Code                                         |
|----------|-----------------------------------------------------------------------------------------------------------------------------------------------------------------------|------------------------------------------------------------------------------------------------------------------------|--------------------------------------------------------------------|----------------------------------------------|--------------------------------------|----------------------------|---------------------------------------|----------------------------------------------|
| START A5 | Start statin therapy with a documented history of coronary, cerebral or peripheral vascular disease, unless the patient's status is end-of-life or age is > 85 years. | I20*, I21*, I22*, I23*,<br>I24*, I25*, E10.5, E11.5,<br>E14.5, I70.2, I73.9,<br>I74.3, I63*, I64*, I65*,<br>I66*, G45* | KFN*, KZFX01                                                       | N03*, N011*, N18*,<br>N19*                   | M62.8, T79.6                         | C10AA*, C10B*              | (A   B) & [(C   [D within 6 months])] | {(A   B) & [(C   [D within 6 months])]} & !E |

| ID       | Description                                                                                | A<br>ICD-10<br><i>Heart failure</i> | B<br>ATC<br><i>Angiotensin-converting-<br/>enzyme inhibitors or<br/>angiotensin II receptor<br/>blockers</i> | Risk | Code   |
|----------|--------------------------------------------------------------------------------------------|-------------------------------------|--------------------------------------------------------------------------------------------------------------|------|--------|
| START A6 | Start ACE inhibitor with systolic heart failure and/or documented coronary artery disease. | I50*, I11.0, I13.0, I13.2           | C09A*, C09B*, C09C*,<br>C09D*                                                                                | A    | A & IB |

| ID       | Description                                      | A<br>ICD-10<br><i>Ischaemic heart disease</i> | B<br>Procedure codes<br><i>Coronary implants<br/>(CABG or PCI)</i> | C<br>ICD-10<br><i>Heart failure</i> | D<br>ATC<br><i>Beta blockers</i> | Risk         | Code                |
|----------|--------------------------------------------------|-----------------------------------------------|--------------------------------------------------------------------|-------------------------------------|----------------------------------|--------------|---------------------|
| START A7 | Start beta-blocker with ischaemic heart disease. | I20*, I21*, I22*, I24*,<br>I25*               | KFN*, KZFX01                                                       | I50*, I11.0, I13.0, I13.2           | C07*                             | (A   B) & IC | [(A   B) & !C] & !D |

| ID       | Description                                                                                                         | A<br>ICD-10<br><i>Heart failure</i> | B<br>ATC<br><i>Beta blockers<br/>(bisoprolol, nebivolol,<br/>metoprolol, or carvedilol)</i>                               | Risk | Code   |
|----------|---------------------------------------------------------------------------------------------------------------------|-------------------------------------|---------------------------------------------------------------------------------------------------------------------------|------|--------|
| START A8 | Start appropriate beta-blocker (bisoprolol, nebivolol, metoprolol or carvedilol) with stable systolic heart failure | I50*, I11.0, I13.0, I13.2           | C07AB02, C07AB07,<br>C07AB12, C07AG02,<br>C07BB02, C07BB07,<br>C07BB12, C07BB52,<br>C07CB02, C07FB02,<br>C07FB07, C07FB12 | A    | A & IB |

| ID | Description | A<br>ICD-10<br><i>Asthma or chronic<br/>obstructive pulmonary<br/>disease</i> | B<br>ATC<br><i>Beta-2 agonists<br/>(inhalation) or<br/>antimuscarinic<br/>bronchodilators</i> | Risk | Code |
|----|-------------|-------------------------------------------------------------------------------|-----------------------------------------------------------------------------------------------|------|------|
|    |             |                                                                               |                                                                                               |      |      |

|                 |                                                                                                                                       |                                       |                                                                                                                  |   |        |
|-----------------|---------------------------------------------------------------------------------------------------------------------------------------|---------------------------------------|------------------------------------------------------------------------------------------------------------------|---|--------|
| <b>START B1</b> | Start regular inhaled b2 agonist or antimuscarinic bronchodilator (e.g. ipratropium, tiotropium) for mild to moderate asthma or COPD. | J40, J41*, J42, J43*, J44*, J45*, J46 | R03AC*, R03AK04, R03AK05, R03AK06, R03AK07, R03AK08, R03AK09, R03AK10, R03AK11, R03AK12, R03AK13, R03AL*, R03BB* | A | A & IB |
|-----------------|---------------------------------------------------------------------------------------------------------------------------------------|---------------------------------------|------------------------------------------------------------------------------------------------------------------|---|--------|

| ID              | Description                                                                                                                                                   | A                                                           | B                                             | Risk | Code   |
|-----------------|---------------------------------------------------------------------------------------------------------------------------------------------------------------|-------------------------------------------------------------|-----------------------------------------------|------|--------|
|                 |                                                                                                                                                               | ICD-10<br><i>Alzheimer's dementia or Lewy body dementia</i> | ATC<br><i>Acetylcholinesterase inhibitors</i> |      |        |
| <b>START C3</b> | Start acetylcholinesterase inhibitor (e.g. donepezil, rivastigmine, galantamine) for mild-moderate Alzheimer's dementia or Lewy Body dementia (rivastigmine). | G30*, F00*, G31.8                                           | N06DA*                                        | A    | A & IB |

| ID              | Description                                                                                                                                                                                                                                        | A                                  | B                            | C                                                            | D                                                                                          | Risk                         | Code                                |
|-----------------|----------------------------------------------------------------------------------------------------------------------------------------------------------------------------------------------------------------------------------------------------|------------------------------------|------------------------------|--------------------------------------------------------------|--------------------------------------------------------------------------------------------|------------------------------|-------------------------------------|
|                 |                                                                                                                                                                                                                                                    | ICD-10<br><i>Diabetes mellitus</i> | ICD-10<br><i>Proteinuria</i> | ICD-10<br><i>Diabetes mellitus with renal manifestations</i> | ATC<br><i>Angiotensin-converting-enzyme inhibitors or angiotensin II receptor blockers</i> |                              |                                     |
| <b>START F1</b> | Start ACE inhibitor or Angiotensin Receptor Blocker (if intolerant of ACE inhibitor) in diabetes with evidence of renal disease i.e. dipstick proteinuria or microalbuminuria (>30mg/24 hours) with or without serum biochemical renal impairment. | E10*, E11*, E12*, E13*, E14*       | R80                          | E10.2, E11.2, E12.2, E13.2, E14.2, N08.3                     | C09A*, C09B*, C09C*, C09D*                                                                 | (A & B (B later than A))   C | ((A & B (B later than A))   C) & ID |

| ID              | Description                                                                                                                                                                                                                         | A                           | B                                  | C                                                              | D                              | E                                                   | F                                                              | Risk                                                                    | Code                                                                           |
|-----------------|-------------------------------------------------------------------------------------------------------------------------------------------------------------------------------------------------------------------------------------|-----------------------------|------------------------------------|----------------------------------------------------------------|--------------------------------|-----------------------------------------------------|----------------------------------------------------------------|-------------------------------------------------------------------------|--------------------------------------------------------------------------------|
|                 |                                                                                                                                                                                                                                     | ICD-10<br><i>Prostatism</i> | ICD-10<br><i>Urinary retention</i> | Procedure codes<br><i>Prostatectomy</i>                        | ICD-10<br><i>Heart failure</i> | ICD-10<br><i>Orthostatic hypotension or syncope</i> | ATC<br><i>Alpha-1 blockers or 5-alpha-reductase inhibitors</i> |                                                                         |                                                                                |
| <b>START G1</b> | Start alpha-1 receptor blocker with symptomatic prostatism, where prostatectomy is not considered necessary.<br><br>Start 5-alpha reductase inhibitor with symptomatic prostatism, where prostatectomy is not considered necessary. | N40*                        | R33*                               | KKCC10, KKCC11, KKCC20, KKCC21, KKEC00, KKEC01, KKEC10, KKEC20 | I50*, I11.0, I13.0, I13.2      | I95.1, R55*                                         | C02CA, G04CA*, G04CB*                                          | (Male sex & [A   (B within 6 months)]) & !(C   D   [E within 6 months]) | ((Male sex & [A   (B within 6 months)]) & !(C   D   [E within 6 months])) & !F |

| ID              | Description                                                                        | A                                                        | B                           | Risk | Code                   |
|-----------------|------------------------------------------------------------------------------------|----------------------------------------------------------|-----------------------------|------|------------------------|
|                 |                                                                                    | ATC<br><i>Verapamil (and combinations) and diltiazem</i> | ATC<br><i>Beta blockers</i> |      |                        |
| <b>STOPP B3</b> | Stop beta-blocker in combination with verapamil or diltiazem (risk of heart block) | C08DA01, C09BB10, C08DA51, C08DB01                       | C07*                        | All  | A & B (in combination) |

| ID              | Description                                                                                                                        | A                            | B                                               | C                           | Risk                    | Code                          |
|-----------------|------------------------------------------------------------------------------------------------------------------------------------|------------------------------|-------------------------------------------------|-----------------------------|-------------------------|-------------------------------|
|                 |                                                                                                                                    | ICD-10<br><i>Bradycardia</i> | ICD-10<br><i>AV block or other heart blocks</i> | ATC<br><i>Beta blockers</i> |                         |                               |
| <b>STOPP B4</b> | Stop beta-blocker with bradycardia (<50/min), type II heart block or complete heart block (risk of complete heart block, asystole) | I49.5, R00.1                 | I44.1, I44.2, I44.3, I45.5, I45.9, Q24.6        | C07*                        | (A within 6 months)   B | [(A within 6 months)   B] & C |

| ID              | Description                                                                                                                                                                 | A                                                  | B                                                             | C                        | Risk                    | Code                        |
|-----------------|-----------------------------------------------------------------------------------------------------------------------------------------------------------------------------|----------------------------------------------------|---------------------------------------------------------------|--------------------------|-------------------------|-----------------------------|
|                 |                                                                                                                                                                             | ICD-10<br><i>Supraventricular tachyarrhythmias</i> | ATC<br><i>Beta blockers, digoxin, verapamil, or diltiazem</i> | ATC<br><i>Amiodarone</i> |                         |                             |
| <b>STOPP B5</b> | Stop amiodarone as first-line antiarrhythmic therapy in supraventricular tachyarrhythmias (higher risk of side-effects than beta-blockers, digoxin, verapamil or diltiazem) | I47.1, I48*                                        | C01AA05, C07*, C08DA01, C08DB01                               | C01BD01                  | A & IB (within 3 years) | A & IB (within 3 years) & C |

| ID | Description | A      | B      | C      | D   | E   | Risk | Code |
|----|-------------|--------|--------|--------|-----|-----|------|------|
|    |             | ICD-10 | ICD-10 | ICD-10 | ATC | ATC |      |      |

|                 |                                                                                                        |                     |                           |                               |                                                                                                                                    |                       |                                   |                                         |
|-----------------|--------------------------------------------------------------------------------------------------------|---------------------|---------------------------|-------------------------------|------------------------------------------------------------------------------------------------------------------------------------|-----------------------|-----------------------------------|-----------------------------------------|
|                 |                                                                                                        | <i>Hypertension</i> | <i>Heart failure</i>      | <i>Chronic kidney disease</i> | <i>Potassium-sparing agents, thiazides, beta blockers, calcium channel blockers, agents acting on the renin-angiotensin system</i> | <i>Loop diuretics</i> |                                   |                                         |
| <b>STOPP B6</b> | Loop diuretic as first-line treatment for hypertension (safer, more effective alternatives available). | I10*, I15*          | I50*, I11.0, I13.0, I13.2 | N03*, N011*, N18*, N19*       | C03D*, C03AA*, C07*, C08*, C09*                                                                                                    | C03C*, C03EB*         | A & ![B   C   (D within 3 years)] | (A & ![B   C   (D within 3 years)]) & E |

| ID               | Description                                                                                                                                                                                                                                   | A<br>ICD-10<br><i>Heart failure</i> | B<br>ATC<br><i>Phosphodiesterase-5 selective inhibitors</i> | Risk | Code  |
|------------------|-----------------------------------------------------------------------------------------------------------------------------------------------------------------------------------------------------------------------------------------------|-------------------------------------|-------------------------------------------------------------|------|-------|
| <b>STOPP B13</b> | Stop phosphodiesterase type-5 inhibitors (e.g. sildenafil, tadalafil, vardenafil) in severe heart failure characterized by hypotension i.e. systolic BP < 90 mmHg, or concurrent nitrate therapy for angina (risk of cardiovascular collapse) | I50*, I11.0, I13.0, I13.2           | G04BE03, G04BE08, G04BE09, G04BE10                          | A    | A & B |

| ID              | Description                                                                                                                                                                                                                                                                                        | A<br>ICD-10<br><i>Bleeding diathesis</i> | B<br>ICD-10<br><i>Recent gastrointestinal bleeding</i> | C<br>ICD-10<br><i>Cerebral hemorrhage</i> | D<br>ATC<br><i>Antiplatelet agents, vitamin K antagonists, direct thrombin inhibitors, or factor Xa inhibitors</i> | Risk                          | Code                                |
|-----------------|----------------------------------------------------------------------------------------------------------------------------------------------------------------------------------------------------------------------------------------------------------------------------------------------------|------------------------------------------|--------------------------------------------------------|-------------------------------------------|--------------------------------------------------------------------------------------------------------------------|-------------------------------|-------------------------------------|
| <b>STOPP C3</b> | Acetylsalicylic acid, clopidogrel, dipyridamole, vitamin K antagonists, direct thrombin inhibitors or factor Xa inhibitors with concurrent significant bleeding risk, i.e. uncontrolled severe hypertension, bleeding diathesis, recent non-trivial spontaneous bleeding) (high risk of bleeding). | D66*, D67*, D68.0*, D69.3                | K92.0, K92.1, K92.2                                    | I60*, I61*, I62*                          | B01AA*, B01AC*, B01AE*, B01AF*                                                                                     | A   ((B   C) within 6 months) | (A   ((B   C) within 6 months)) & D |

| ID              | Description                                                                                                                                                                                                                                                                                                          | A<br>ICD-10<br><i>Ischaemic cerebrovascular disease</i> | B<br>ICD-10<br><i>Acute coronary syndrome</i> | C<br>Procedure codes<br><i>Coronary implants (CABG or PCI)</i> | D<br>ICD-10<br><i>Carotid stenosis</i> | E<br>ATC<br><i>Acetylsalicylic acid, carbasalate calcium, or combinations of antiplatelet agents</i> | F<br>ATC<br><i>Clopidogrel</i> | Risk                                                                           | Code                                                                                                      |
|-----------------|----------------------------------------------------------------------------------------------------------------------------------------------------------------------------------------------------------------------------------------------------------------------------------------------------------------------|---------------------------------------------------------|-----------------------------------------------|----------------------------------------------------------------|----------------------------------------|------------------------------------------------------------------------------------------------------|--------------------------------|--------------------------------------------------------------------------------|-----------------------------------------------------------------------------------------------------------|
| <b>STOPP C4</b> | Stop acetylsalicylic acid plus clopidogrel as secondary stroke prevention, unless the patient has a coronary stent(s) inserted in the previous 12 months or concurrent acute coronary syndrome or has a high grade symptomatic carotid arterial stenosis (no evidence of added benefit over clopidogrel monotherapy) | I63*, I64*, G45*                                        | I20.0, I21*, I22*                             | KFN*, KZFX01                                                   | I65.2                                  | B01AC06, B01AC08, B01AC56, B01AC30                                                                   | B01AC04                        | A & (!(B   C) within 12 months)   (!(D within 3 months) & [A within 3 months]) | [A & (!(B   C) within 12 months)   (!(D within 3 months) & [A within 3 months])] & (E & F in combination) |

| ID              | Description                                                                                                                                                                                                                  | A<br>Procedure codes<br><i>Coronary implants (CABG or PCI)</i> | B<br>ICD-10<br><i>Acute coronary syndrome</i> | C<br>ATC<br><i>Vitamin K antagonists, direct thrombin inhibitors, or factor Xa inhibitors</i> | D<br>ATC<br><i>Antiplatelet agents</i> | Risk                      | Code                                                   |
|-----------------|------------------------------------------------------------------------------------------------------------------------------------------------------------------------------------------------------------------------------|----------------------------------------------------------------|-----------------------------------------------|-----------------------------------------------------------------------------------------------|----------------------------------------|---------------------------|--------------------------------------------------------|
| <b>STOPP C6</b> | Stop antiplatelet agents with vitamin K antagonist, direct thrombin inhibitor or factor Xa inhibitors in patients with stable coronary, cerebrovascular or peripheral arterial disease (No added benefit from dual therapy). | KFN*, KZFX01                                                   | I20.0, I21*, I22*                             | B01AA*, B01AE*, B01AF*                                                                        | B01AC*                                 | !(A   B) within 12 months | (!(A   B) within 12 months) & (C & D (in combination)) |

| ID              | Description                                                                                                                                                                                                            | A<br>ICD-10<br><i>Deep venous thrombosis</i> | B<br>ICD-10<br><i>History of pulmonary embolus</i> | C<br>ICD-10<br><i>Atrial fibrillation</i> | D<br>Procedure codes<br><i>Mechanical prosthetic heart valves</i> | E<br>ATC<br><i>Vitamin K antagonists, direct thrombin inhibitors, or factor Xa inhibitors</i> | Risk                                                             | Code                                                                   |
|-----------------|------------------------------------------------------------------------------------------------------------------------------------------------------------------------------------------------------------------------|----------------------------------------------|----------------------------------------------------|-------------------------------------------|-------------------------------------------------------------------|-----------------------------------------------------------------------------------------------|------------------------------------------------------------------|------------------------------------------------------------------------|
| <b>STOPP C8</b> | Stop vitamin K antagonist, direct thrombin inhibitor or factor Xa inhibitors for first deep venous thrombosis without continuing provoking risk factors (e.g. thrombophilia) for > 6 months, (no proven added benefit) | I80*                                         | I26*                                               | I48*                                      | KFCA60, KFGE00, KFJF00, KFKD00, KFKD51, KFMD00, KFMD54            | B01AA*, B01AE*, B01AF*                                                                        | (A for the first time but more than 6 months ago) & !(B   C   D) | [(A for the first time but more than 6 months ago) & !(B   C   D)] & E |



| ID       | Description                                                                                                                                                                                                       | A<br>ICD-10<br><i>Pulmonary embolus</i> | B<br>ICD-10<br><i>History of deep venous thrombosis</i> | C<br>ICD-10<br><i>Atrial fibrillation</i> | D<br>Procedure codes<br><i>Mechanical prosthetic heart valves</i> | E<br>ATC<br><i>Vitamin K antagonists, direct thrombin inhibitors, or factor Xa inhibitors</i> | Risk                                                              | Code                                                                    |
|----------|-------------------------------------------------------------------------------------------------------------------------------------------------------------------------------------------------------------------|-----------------------------------------|---------------------------------------------------------|-------------------------------------------|-------------------------------------------------------------------|-----------------------------------------------------------------------------------------------|-------------------------------------------------------------------|-------------------------------------------------------------------------|
| STOPP C9 | Stop vitamin K antagonist, direct thrombin inhibitor or factor Xa inhibitors for first pulmonary embolus without continuing provoking risk factors (e.g. thrombophilia) for > 12 months (no proven added benefit) | I26*                                    | I80*                                                    | I48*                                      | KFCA60, KFGE00, KFJF00, KFKD00, KFKD51, KFMD00, KFMD54            | B01AA*, B01AE*, B01AF*                                                                        | (A for the first time but more than 12 months ago) & !(B   C   D) | [(A for the first time but more than 12 months ago) & !(B   C   D)] & E |

| ID        | Description                                                                                                                                      | A<br>ATC<br><i>Vitamin K antagonists, direct thrombin inhibitors, or factor Xa inhibitors</i> | B<br>ATC<br><i>Nonsteroidal anti-inflammatory drugs</i> | Risk | Code                   |
|-----------|--------------------------------------------------------------------------------------------------------------------------------------------------|-----------------------------------------------------------------------------------------------|---------------------------------------------------------|------|------------------------|
| STOPP C10 | Stop NSAID and vitamin K antagonist, direct thrombin inhibitor or factor Xa inhibitors in combination (risk of major gastrointestinal bleeding). | B01AA*, B01AE*, B01AF*                                                                        | M01A*, M01BA*, N02BA*                                   | All  | A & B (in combination) |

| ID       | Description                                                                                                                                                                                           | A<br>ICD-10<br><i>Dementia</i>                   | B<br>ICD-10<br><i>Narrow angle glaucoma</i> | C<br>ICD-10<br><i>Cardiac conduction abnormalities</i> | D<br>ICD-10<br><i>Prostatism or urinary retention</i> | E<br>ATC<br><i>Tricyclic antidepressants</i> | Risk                            | Code                                  |
|----------|-------------------------------------------------------------------------------------------------------------------------------------------------------------------------------------------------------|--------------------------------------------------|---------------------------------------------|--------------------------------------------------------|-------------------------------------------------------|----------------------------------------------|---------------------------------|---------------------------------------|
| STOPP D1 | Stop tricyclic antidepressants (TCAs) with dementia, narrow angle glaucoma, cardiac conduction abnormalities, prostatism, or prior history of urinary retention (risk of worsening these conditions). | F00*, F01*, F02*, F03, G30*, G31.0, G31.1, G31.8 | H40.2                                       | I44*, I45*                                             | N40*, R33*                                            | N06AA*, N06CA01, N06CA02                     | A   B   C   (D within 6 months) | (A   B   C   (D within 6 months)) & E |

| ID       | Description                                                                                                                                                                                                                                                              | A<br>ICD-10<br><i>Prostatism or urinary retention</i> | B<br>ATC<br><i>Chlorpromazine, clozapine, flupentixol, fluphenzine, pipotiazine, promazine, or zuclopenthixol</i> | Risk                | Code                    |
|----------|--------------------------------------------------------------------------------------------------------------------------------------------------------------------------------------------------------------------------------------------------------------------------|-------------------------------------------------------|-------------------------------------------------------------------------------------------------------------------|---------------------|-------------------------|
| STOPP D3 | Stop neuroleptics with moderate-marked antimuscarinic/anticholinergic effects (chlorpromazine, clozapine, flupentixol, fluphenzine, pipotiazine, promazine, zuclopenthixol) with a history of prostatism or previous urinary retention (high risk of urinary retention). | N40*, R33*                                            | N05AA01, N05AA03, N05AB02, N05AC04, N05AF01, N05AF05, N05AH02                                                     | (A within 6 months) | (A within 6 months) & B |

| ID       | Description                                                                                                                                                                                                                                                                                                                               | A<br>ATC<br><i>Benzodiazepines</i> | Risk | Code                                    |
|----------|-------------------------------------------------------------------------------------------------------------------------------------------------------------------------------------------------------------------------------------------------------------------------------------------------------------------------------------------|------------------------------------|------|-----------------------------------------|
| STOPP D5 | Stop benzodiazepines for ≥ 4 weeks (no indication for longer treatment; risk of prolonged sedation, confusion, impaired balance, falls, road traffic accidents; all benzodiazepines should be withdrawn gradually if taken for more than 4 weeks as there is a risk of causing a benzodiazepine withdrawal syndrome if stopped abruptly). | N03AE*, N05BA*, N05CD*, N05CF*     | All  | A, if more than 30 DDDs within 3 months |

| ID       | Description                                                                                                                                             | A<br>ICD-10<br><i>Parkinsonism or Lewy Body dementia</i> | B<br>ATC<br><i>Antipsychotics (excluding quetiapine, clozapine and lithium)</i>                                    | Risk | Code  |
|----------|---------------------------------------------------------------------------------------------------------------------------------------------------------|----------------------------------------------------------|--------------------------------------------------------------------------------------------------------------------|------|-------|
| STOPP D6 | Stop antipsychotics (i.e. other than quetiapine or clozapine) in those with parkinsonism or Lewy Body Disease (risk of severe extra-pyramidal symptoms) | G20, G21*, G23.1, G23.2, F02.3, G31.8                    | N05AA*, N05AB*, N05AC*, N05AD*, N05AE*, N05AF*, N05AG*, N05AH01, N05AH03, N05AH05, N05AH06, N05AK*, N05AL*, N05AX* | A    | A & B |

| ID | Description | A<br>ICD-10<br><i>Delirium</i> | B<br>ICD-10<br><i>Dementia</i> | C<br>ATC<br><i>Anticholinergic agents</i> | Risk | Code |
|----|-------------|--------------------------------|--------------------------------|-------------------------------------------|------|------|
|----|-------------|--------------------------------|--------------------------------|-------------------------------------------|------|------|

|                 |                                                                                                                             |      |                                                   |                                                                                                                                                                                                                                                                                                                                                                                                                                                                                                                                                                                            |                         |                               |
|-----------------|-----------------------------------------------------------------------------------------------------------------------------|------|---------------------------------------------------|--------------------------------------------------------------------------------------------------------------------------------------------------------------------------------------------------------------------------------------------------------------------------------------------------------------------------------------------------------------------------------------------------------------------------------------------------------------------------------------------------------------------------------------------------------------------------------------------|-------------------------|-------------------------------|
| <b>STOPP D8</b> | Stop anticholinergics/antimuscarinics in patients with delirium or dementia (risk of exacerbation of cognitive impairment). | F05* | F00*, F01*, F02*, F03*, G30*, G31.0, G31.1, G31.8 | G04BD01, G04BD02, G04BD03, G04BD04, G04BD05, G04BD06, G04BD07, G04BD08, G04BD09, G04BD10, G04BD11, N03AF01, N03AF02, N05AA01, N05AA02, N05AA04, N05AB02, N05AB03, N05AB04, N05AC01, N05AC02, N05AF04, N05AG02, N05AH03, N05AH02, N05BB01, N05BB51, N06AA*, R01AX03, R03AC06, R03AL01, R03AL02, R03AL03, R03AL05, R03AL07, R03AL09, R03BB01, R03BB04, R03BB05, R03BB06, R03BB07, R06AA*, R06AB*, R06AC*, R06AD*, R06AE01, R06AE03, R06AE04, R06AE05, R06AE06, R06AE51, R06AE53, R06AE55, R06AX01, R06AX02, R06AX03, R06AX04, R06AX05, R06AX08, R06AX09, R06AX13, R06AX15, R06AX16, R06AX17, | (A within 6 months)   B | ((A within 6 months)   B) & C |
|-----------------|-----------------------------------------------------------------------------------------------------------------------------|------|---------------------------------------------------|--------------------------------------------------------------------------------------------------------------------------------------------------------------------------------------------------------------------------------------------------------------------------------------------------------------------------------------------------------------------------------------------------------------------------------------------------------------------------------------------------------------------------------------------------------------------------------------------|-------------------------|-------------------------------|

| ID              | Description                                                                                                                                                                                                          | A<br>ICD-10<br>Dementia                           | B<br>ICD-10<br>Schizophrenic disorders or psychotic disorders | C<br>ICD-10<br>Sleeping disorders | D<br>ATC<br>Antipsychotics                                                             | Risk                          | Code                                |
|-----------------|----------------------------------------------------------------------------------------------------------------------------------------------------------------------------------------------------------------------|---------------------------------------------------|---------------------------------------------------------------|-----------------------------------|----------------------------------------------------------------------------------------|-------------------------------|-------------------------------------|
| <b>STOPP D9</b> | Stop neuroleptic antipsychotic in patients with behavioral and psychological symptoms of dementia (BPSD) unless symptoms are severe and other non-pharmacological treatments have failed (increased risk of stroke). | F00*, F01*, F02*, F03*, G30*, G31.0, G31.1, G31.8 | F20*, F25*, F29*                                              | F51.0, G47.0                      | N05AA*, N05AB*, N05AC*, N05AD*, N05AE*, N05AF*, N05AG*, N05AH*, N05AK*, N05AL*, N05AX* | A & !B & !(C within 6 months) | (A & !B & !(C within 6 months)) & D |

| ID               | Description                                                                                                                                                                                                                                                                                                                  | A<br>ICD-10<br>Dementia                          | B<br>ICD-10<br>Bradycardia | C<br>ICD-10<br>Heart block               | D<br>ICD-10<br>Syncope | E<br>ATC<br>Beta blockers, digoxin, diltiazem, or verapamil | F<br>ATC<br>Acetylcholinesterase inhibitors | Risk                                                    | Code                                                                                   |
|------------------|------------------------------------------------------------------------------------------------------------------------------------------------------------------------------------------------------------------------------------------------------------------------------------------------------------------------------|--------------------------------------------------|----------------------------|------------------------------------------|------------------------|-------------------------------------------------------------|---------------------------------------------|---------------------------------------------------------|----------------------------------------------------------------------------------------|
| <b>STOPP D11</b> | Stop acetylcholinesterase inhibitors with a known history of persistent bradycardia (< 60 beats/min.), heart block or recurrent unexplained syncope or concurrent treatment with drugs that reduce heart rate such as beta-blockers, digoxin, diltiazem, verapamil (risk of cardiac conduction failure, syncope and injury). | F00*, F01*, F02*, F03, G30*, G31.0, G31.1, G31.8 | I49.5, R00.1               | I44.1, I44.2, I44.3, I45.5, I45.9, Q24.6 | R55*                   | C01AA05, C07*, C08DA01, C08DA51, C08DB01, C09BB10           | N06DA*                                      | A & (B (within 6 months)   C   (D within 6 months)   E) | (A & (B (within 6 months)   C   (D within 6 months)   E)) & F (E and F in combination) |

| ID               | Description                                                                                                                                                                                                                                                                                                                                                                 | A<br>ATC<br>Antipsychotics                           | B<br>ATC<br>Phenothiazines      | Risk                | Code                    |
|------------------|-----------------------------------------------------------------------------------------------------------------------------------------------------------------------------------------------------------------------------------------------------------------------------------------------------------------------------------------------------------------------------|------------------------------------------------------|---------------------------------|---------------------|-------------------------|
| <b>STOPP D12</b> | Stop phenothiazines as first-line treatment, since safer and more efficacious alternatives exist (phenothiazines are sedative, have significant anti-muscarinic toxicity in older people, with the exception of prochlorperazine for nausea/vomiting/vertigo, chlorpromazine for relief of persistent hiccoughs and levomepromazine as an anti-emetic in palliative care ). | N05AE05, N05AH04, N05AL05, N05AX08, N05AX12, N05AX13 | N05AA*, N05AB*, N05AC*, N05AX07 | !(A within 3 years) | !(A within 3 years) & B |

| ID | Description | A<br>ATC<br>Adrenergic inhalants, glucocorticoid inhalants, or anticholinergic inhalants | B<br>ATC<br>Theophylline | Risk | Code |
|----|-------------|------------------------------------------------------------------------------------------|--------------------------|------|------|
|    |             |                                                                                          |                          |      |      |

**STOPP G1** Stop theophylline as monotherapy for COPD (safer, more effective alternative; risk of adverse effects due to narrow therapeutic index). R03A\*, R03BA\*, R03BB\* R03DA04 !A !A & B

| ID              | Description                                                                                                                                                                                        | A<br>ICD-10<br>Narrow angle glaucoma | B<br>ICD-10<br>Prostatism or urinary retention | C<br>ATC<br>Antimuscarinic bronchodilators | Risk                    | Code                           |
|-----------------|----------------------------------------------------------------------------------------------------------------------------------------------------------------------------------------------------|--------------------------------------|------------------------------------------------|--------------------------------------------|-------------------------|--------------------------------|
| <b>STOPP G3</b> | Stop antimuscarinic bronchodilators (e.g. ipratropium, tiotropium) with a history of narrow angle glaucoma (may exacerbate glaucoma) or bladder outflow obstruction (may cause urinary retention). | H40.2                                | N40*, R33*                                     | R01AX03, R03AL*, R03BB*                    | A   (B within 6 months) | (A   (B within 6 months) ) & C |

| ID              | Description                                                                                                                                                                                                                                               | A<br>ATC<br>Nonsteroidal anti-inflammatory drugs | Risk | Code                                    |
|-----------------|-----------------------------------------------------------------------------------------------------------------------------------------------------------------------------------------------------------------------------------------------------------|--------------------------------------------------|------|-----------------------------------------|
| <b>STOPP H6</b> | Stop long-term NSAID or colchicine (>3 months) for chronic treatment of gout where there is no contraindication to a xanthine-oxidase inhibitor (e.g. allopurinol, febuxostat) (xanthine-oxidase inhibitors are first choice prophylactic drugs in gout). | M01A*, M01BA*, N02BA*                            | All  | A, if more than 90 DDDs within 6 months |

| ID              | Description                                                                                                             | A<br>ICD-10<br>Coronary, cerebral or peripheral vascular disease                                           | B<br>Procedure codes<br>Coronary implants (CABG or PCI) | C<br>ATC<br>COX 2 selective nonsteroidal anti-inflammatory drugs | Risk  | Code        |
|-----------------|-------------------------------------------------------------------------------------------------------------------------|------------------------------------------------------------------------------------------------------------|---------------------------------------------------------|------------------------------------------------------------------|-------|-------------|
| <b>STOPP H7</b> | Stop COX-2 selective NSAIDs with concurrent cardiovascular disease (increased risk of myocardial infarction and stroke) | I20*, I21*, I22*, I23*, I24*, I25*, E10.5, E11.5, E14.5, I70.2, I73.9, I74.3, I63*, I64*, I65*, I66*, G45* | KFN*, KZFX01                                            | M01AH*                                                           | A   B | (A   B) & C |

| ID              | Description                                                                                                                                                                                                                             | A<br>ICD-10<br>Dementia                            | B<br>ICD-10<br>Delirium | C<br>ICD-10<br>Narrow angle glaucoma | D<br>ICD-10<br>Prostatism and urinary retention | E<br>ATC<br>Bladder antimuscarinic agents                                                         | Risk                                              | Code                                                    |
|-----------------|-----------------------------------------------------------------------------------------------------------------------------------------------------------------------------------------------------------------------------------------|----------------------------------------------------|-------------------------|--------------------------------------|-------------------------------------------------|---------------------------------------------------------------------------------------------------|---------------------------------------------------|---------------------------------------------------------|
| <b>STOPP I1</b> | Stop antimuscarinic drugs with dementia, or chronic cognitive impairment (risk of increased confusion, agitation) or narrow-angle glaucoma (risk of acute exacerbation of glaucoma), or chronic prostatism (risk of urinary retention). | F00*, F01*, F02*, F03*, G30*, G31.0, G31.1, G31.8, | F05*                    | H40.2                                | N40*, R33*                                      | G04BD01, G04BD02, G04BD03, G04BD04, G04BD05, G04BD06, G04BD07, G04BD08, G04BD09, G04BD10, G04BD11 | A   (B within 6 months)   C   (D within 6 months) | [A   (B within 6 months)   C   (D within 6 months)] & E |

| ID              | Description                                                                                                                       | A<br>ICD-10<br>Heart failure | B<br>ATC<br>Thiazolidenediones (e.g. rosiglitazone, pioglitazone) or combinations | Risk | Code  |
|-----------------|-----------------------------------------------------------------------------------------------------------------------------------|------------------------------|-----------------------------------------------------------------------------------|------|-------|
| <b>STOPP J2</b> | Stop thiazolidenediones (e.g. rosiglitazone, pioglitazone) in patients with heart failure (risk of exacerbation of heart failure) | I50*, I11.0, I13.0, I13.2    | A10BD03, A10BD04, A10BD05, A10BD06, A10BD09, A10BD12, A10BG*                      | A    | A & B |

| ID              | Description                                                                                               | A<br>ICD-10<br>History of breast cancer | B<br>ICD-10<br>History of venous thromboembolisms | C<br>ATC<br>Estrogens (or combinations)                                                                                                               | Risk                 | Code                       | Note                                                                                                                                 |
|-----------------|-----------------------------------------------------------------------------------------------------------|-----------------------------------------|---------------------------------------------------|-------------------------------------------------------------------------------------------------------------------------------------------------------|----------------------|----------------------------|--------------------------------------------------------------------------------------------------------------------------------------|
| <b>STOPP J4</b> | Stop oestrogens with a history of breast cancer or venous thromboembolism (increased risk of recurrence). | C50*, D05*                              | I80*, I81*, I82*, I26*                            | G02BB*, G03AA*, G03AB*, G03CA01, G03CA06, G03CA07, G03CA09, G03CA53, G03CA57, G03CB*, G03CC*, G03EA*, G03EB*, G03F*, G03HB*, G03XC*, G03CA03, G03CA04 | Female sex & (A   B) | (Female sex & (A   B)) & C | Estradiol (ATC: G03CA03) only, if whoadmvej = "DEPPLA "GEL "TABFI LM", and Estriol (ATC: G03CA04) only, if if whoadmvej = "TAB "VAG" |

| ID | Description | A<br>ICD-10<br>Hypogonadism | B<br>ATC<br>Androgens | Risk | Code |
|----|-------------|-----------------------------|-----------------------|------|------|
|----|-------------|-----------------------------|-----------------------|------|------|

|                 |                                                                                                                                                                               |                                          |       |               |                     |
|-----------------|-------------------------------------------------------------------------------------------------------------------------------------------------------------------------------|------------------------------------------|-------|---------------|---------------------|
| <b>STOPP J6</b> | Stop androgens (male sex hormones) in the absence of primary or secondary hypogonadism (risk of androgen toxicity; no proven benefit outside of the hypogonadism indication). | E29.1, E89.5, Q98.0, Q98.1, Q98.2, Q98.4 | G03B* | Male sex & !A | (Male sex & !A) & B |
|-----------------|-------------------------------------------------------------------------------------------------------------------------------------------------------------------------------|------------------------------------------|-------|---------------|---------------------|

| ID              | Description                                                                                                                                                                                                                                                                      | A                                                   | B                                                                                                                                                           | Risk                | Code                    |
|-----------------|----------------------------------------------------------------------------------------------------------------------------------------------------------------------------------------------------------------------------------------------------------------------------------|-----------------------------------------------------|-------------------------------------------------------------------------------------------------------------------------------------------------------------|---------------------|-------------------------|
|                 |                                                                                                                                                                                                                                                                                  | ICD-10<br><i>Orthostatic hypotension or syncope</i> | ATC<br><i>Vasodilator drugs (alpha-1 blockers, calcium channel blockers, angiotensin-converting-enzyme inhibitors, or angiotensin II receptor blockers)</i> |                     |                         |
| <b>STOPP K3</b> | Stop vasodilator drugs (e.g. alpha-1 receptor blockers, calcium channel blockers, long-acting nitrates, ACE inhibitors, angiotensin I receptor blockers, ) with persistent postural hypotension i.e. recurrent drop in systolic blood pressure ≥ 20mmHg (risk of syncope, falls) | I95.1, R55*                                         | C01DA*, C02CA*, C02LE01, C07AG*, C07BG*, C07CG*, C08*, C09*, G04CA*                                                                                         | (A within 6 months) | (A within 6 months) & B |

| ID             | Description                                                                              | A                                                      | B                                                                                                             | C                                                    | D                                                                                                                                                                                                                                             | E                                                      | F                                                                                                          | G                | H                                                                                                 | I                                                                           | Risk | Code                                                                       |
|----------------|------------------------------------------------------------------------------------------|--------------------------------------------------------|---------------------------------------------------------------------------------------------------------------|------------------------------------------------------|-----------------------------------------------------------------------------------------------------------------------------------------------------------------------------------------------------------------------------------------------|--------------------------------------------------------|------------------------------------------------------------------------------------------------------------|------------------|---------------------------------------------------------------------------------------------------|-----------------------------------------------------------------------------|------|----------------------------------------------------------------------------|
|                |                                                                                          | ATC<br><i>Selective beta-2-adrenoreceptor agonists</i> | ATC<br><i>Adrenergics in combination with anticholinergics incl. triple combinations with corticosteroids</i> | ATC<br><i>Anticholinergic agents</i>                 | ATC<br><i>Antihistamines for systemic use</i>                                                                                                                                                                                                 | ATC<br><i>Carboxamide derivatives (antiepileptics)</i> | ATC<br><i>Antipsychotics</i>                                                                               |                  |                                                                                                   | ATC<br><i>Non-selective monoamine reuptake inhibitors (antidepressants)</i> |      |                                                                            |
| <b>STOPP M</b> | Stop concomitant use of two or more drugs with antimuscarinic/anticholinergic properties | R03AC06                                                | R03AL01, R03AL02, R03AL03, R03AL05, R03AL07, R03AL09                                                          | R03AX03, R03BB01, R03BB04, R03BB05, R03BB06, R03BB07 | R06AA*, R06AB*, R06AC*, R06AD*, R06AE01, R06AE03, R06AE04, R06AE05, R06AE06, R06AE51, R06AE53, R06AE55, R06AX01, R06AX02, R06AX03, R06AX04, R06AX05, R06AX08, R06AX09, R06AX13, R06AX15, R06AX16, R06AX17, R06AX23, R06AX27, R06AX53, R06AX58 | N03AF01, N03AF02                                       | N05AA01, N05AA02, N05AA04, N05AB02, N05AB03, N05AB04, N05AC01, N05AC02, N05AF04, N05AG02, N05AH02, N05AH03 | N05BB01, N05BB51 | G04BD01, G04BD02, G04BD03, G04BD04, G04BD05, G04BD06, G04BD07, G04BD08, G04BD09, G04BD10, G04BD11 | N06AA*                                                                      | All  | Two or more drugs from each of the subgroups concurrently (in combination) |
